1      **Distinct control of PERIOD2 degradation and circadian rhythms by the oncoprotein MDM2**

2  
3  
4  
5  
6  
7  
8  
9  
10  
11  
12  
13  
14  
15  
16  
17  
18  
19  
20  
21

JingJing Liu<sup>1,2,6</sup>, Xianlin Zou<sup>1,6</sup>, Tetsuya Gotoh<sup>1,5</sup>, Anne M. Brown<sup>3</sup>, Liang Jiang<sup>1</sup>, Jae Kyoung Kim<sup>4</sup>, &  
Carla V. Finkielstein<sup>1,\*</sup>

<sup>1</sup> Integrated Cellular Responses Laboratory, Department of Biological Sciences, Virginia Tech, Blacksburg, VA, United States

<sup>2</sup> Present address: Department of Computational Biology, St Jude Children's Research Hospital, Memphis, TN, United States

<sup>3</sup> Research and Informatics, University Libraries, Virginia Tech, Blacksburg, VA, United States

<sup>4</sup> Department of Mathematical Sciences, Korea Advanced Institute of Science and Technology, Daejeon, South Korea

<sup>5</sup> Present address: Laboratory of Cell Systems, Institute for Protein Research, Osaka University, Osaka, Japan

<sup>6</sup> These authors contributed equally to this work.

\* Correspondence and request for materials should be addressed to C.V.F. (email: [finkielc@vt.edu](mailto:finkielc@vt.edu))

22 **ABSTRACT**

23 The circadian clock relies on post-translational modifications to set the timing for degradation of core  
24 regulatory components and, thus, sets clock progression. Ubiquitin-modifying enzymes targeting clock  
25 components for degradation are known to mostly recognize phosphorylated substrates. A case in point is  
26 the circadian factor *PERIOD 2* (PER2) whose phospho-specific turnover involves its recognition by  $\beta$ -  
27 transducin repeat containing proteins ( $\beta$ -TrCPs). Yet, the existence of this unique mode of regulation of  
28 PER2's stability falls short of explaining persistent oscillatory phenotypes reported in biological systems  
29 lacking functional elements of the phospho-dependent PER2 degradation machinery.

30 In this study, we challenge the phosphorylation-centric view that PER2 degradation enhances circadian  
31 rhythm robustness by *i*) identifying the PER2:MDM2 endogenous complex, *ii*) establishing PER2 as a  
32 previously uncharacterized substrate for MDM2, *iii*) revealing an alternative phosphorylation-independent  
33 mechanism for PER2 ubiquitin-mediated degradation, *iv*) pinpointing residues for ubiquitin modification,  
34 and *v*) establishing the importance of MDM2-mediated PER2 turnover for defining the circadian period  
35 length. Our results not only expand MDM2's suite of specific substrates beyond the cell cycle to include  
36 circadian components but also uncover novel regulatory players that likely impact our view of how other  
37 mechanisms crosstalk and modulate the clock itself.

38

## 39 INTRODUCTION

40 Circadian rhythms are endogenously-generated 24-h oscillations of biochemical, physiological, and  
41 behavioral processes that allow organisms to adapt to external environmental conditions. The coupling of  
42 the mammalian circadian system to various cellular process provides a means to understand the timing of  
43 when events take place in normal proliferative cells, a phenomenon believed to reflect evolutionary  
44 adaptation [for review see (1)]. As a result, identifying shared regulatory elements that operate under  
45 normal conditions and are relevant to the timely execution of cellular events might help establish nodes  
46 whose deregulation would be relevant to the understanding of human pathologies.

47 From a molecular standpoint, the circadian clock is formed by a transcriptional-translational feedback  
48 loop where expression of the core components drives the different phases of the daily cycle and whose  
49 protein products influence the cell's biochemistry (2). In mammalian cells, the positive limb of the clock  
50 is driven by the heterodimer formed by the *c*ircadian *l*ocomotor *o*utput *c*ycles *k*aput (CLOCK) and the  
51 *b*rain and *m*uscle *A*rn*t*-*l*ike protein-*1* (BMAL1) complex, which initiates the transcription of *PERIOD* and  
52 *CRYTOCHROME* genes (*PER 1,2,3* and *CRY 1,2*) as well as other *c*lock-*c*ontrolled genes (*ccgs*). Of note,  
53 several *ccgs* encode for cell cycle regulators. Dimerization of PER and CRY is relevant to the negative  
54 limb of the feedback loop as nuclear translocation of the complex further inhibits CLOCK/BMAL1  
55 transcriptional activity [for review see (3)]. Thus, the stability of PER and CRY proteins is pertinent to  
56 the timing at which the termination of the repression phase takes place and the initiation of a new round  
57 of transcription begins. This process is mediated by distinct phosphorylation events in PER and CRY that  
58 precede E3-ligase-mediated ubiquitination and proteasomal degradation [for review see (3) and references  
59 within].

60 PERIOD 2 is a large protein with a well-defined N-terminus domain that is responsible for multiple  
61 protein-protein interactions, including homo- and hetero-dimerization among PER proteins (4). In  
62 addition, PER2 exhibits motifs and domains that play critical functional roles in its cellular localization  
63 (nuclear localization and export signal motifs), stability (binding domain for E3 ligase), and post-  
64 translationally-targeted modifications (including *c*asein *k*inase *1*  $\epsilon/\delta$ , CK1  $\epsilon/\delta$  and *g*lycogen *s*ynthase  
65 *k*inase 3 $\beta$ , GSK3 $\beta$ , phosphorylation sites), which influence the periodic accumulation and distribution of  
66 PER2 in the cell [for review see (5)]. Furthermore, the stability of PER2, which seems to depend on its  
67 phosphorylation status (6,7), is influenced by environmental stimuli and homeostatic cellular conditions  
68 (8-10) and is a critical determinant of the period length and phase of circadian rhythms (6,7,11). As a  
69 result, PER2 acts as a cellular rheostat that integrates signals and helps to robustly compensate for  
70 profound changes in environmental conditions that would otherwise affect the circadian clock.

71 Phosphorylation of PER2 by CK1  $\epsilon/\delta$  can either stabilize or destabilize the circadian factor depending on  
72 what cluster site in PER2 is modified (9,11,12). Accordingly, PER2<sup>S662G</sup>, a PER2 variant linked to  
73 familial advanced sleep phase syndrome (13), contains a missense mutation that prevents priming-  
74 dependent phosphorylation of flanking sites by CK1  $\epsilon/\delta$ , stabilizing PER2 independent of its cellular  
75 location (14). Conversely, a priming-independent cluster located in the C-terminus of PER2's PAS  
76 domain is targeted by CK1  $\epsilon/\delta$  and is required for ubiquitin ligase-mediated degradation of PER2 (15).  
77 Presently, our understanding of the molecular players involved in PER2 degradation is reduced to the sole  
78 role of  $\beta$ -TrCP, an F-box/WD40 repeat-containing substrate recognition subunit of the ubiquitin ligase  
79 complex SCF (Skp1-Cul1-F-box), that channels phosphorylation-dependent degradation of proteins  
80 (15,16). The mammalian  $\beta$ -TrCP E3 ligase subfamily includes  $\beta$ -TrCP1 and  $\beta$ -TrCP2, both of which are  
81 closely related in sequence and indistinguishable in function but encoded by different genes (17).  
82 Biochemical evidence points to direct interactions between  $\beta$ -TrCP1/2 and PER1, but  $\beta$ -TrCP1, appears  
83 to be the sole form implicated in the binding of PER2 *in vitro* (15,18). Regardless of these findings, there  
84 is no clear answer as to whether  $\beta$ -TrCP-targeted selectivity actually happens *in vivo* even though  $\beta$ -  
85 TrCP-mediated degradation contributes to generating cyclic levels of PER proteins relevant to the  
86 function of the clock (16). As has been noted, endogenous  $\beta$ -TrCPs' activities depend on their  
87 localization and abundance in cells with  $\beta$ -TrCP1 being predominantly located in the nucleus and  $\beta$ -  
88 TrCP2, the most unstable form of both E3-ligases, being predominantly located in the cytoplasmic  
89 compartment (17).

90 Interestingly, findings show that overexpression of both dominant-negative forms of  $\beta$ -TrCP in cells  
91 neither increased PER2 stability nor accumulated phosphorylated PER2; instead, it resulted in rapid  
92 degradation of PER2 by a yet unknown mechanism (16). Similarly, expression of the dominant-negative  
93 form of CK1 $\epsilon$  in a CK1 $\delta^{-/-}$  background perturbs, but does not abrogate, circadian rhythms (19), a result  
94 that mimics one obtained using pharmacological inhibitors (20). More recently, Zhou and Kim *et al.*, have  
95 defined a phosphoswitch in PER2 that generates a three-stage kinetic degradation process (9). This  
96 mechanism allows fine-tuning of the stable fraction of PER2 and, therefore, adjusts the length of the  
97 circadian period due to diverse environmental stimuli (9). Remarkably, whereas the rapid initial decay in  
98 PER2 levels is phosphorylation-dependent and mediated by the activity of  $\beta$ -TrCP, the second "plateau"  
99 stage results from priming phosphorylation and accumulation of PER2 (9). Triggering PER2's  
100 degradation in the third kinetic stage and during the falling phase of the circadian cycle are predicted to be  
101 independent of both phosphorylation and  $\beta$ -TrCP activity (9). More recently, findings using mice bearing  
102 loss-of-function mutations in  $\beta$ -TrCP1 and  $\beta$ -TrCP2 genes show that their behavioral wake/sleep  
103 phenotype is molecularly linked to PER degradation (21). Interestingly, the data show that PER proteins



104 “were still [ubiquitinated and] degraded, albeit at a slower rate (21)” in double knockout  $\beta$ -TrCP1/2  
105 cells. Thus, other E3 ligase(s) in addition to  $\beta$ -TrCP likely exist and contribute to PER’s overall stability.  
106 We previously reported that PER2 forms a stable complex with the checkpoint and tumor suppressor  
107 protein p53 (22). The PER2:p53 complex undergoes time-of-day dependent nuclear-cytoplasmic  
108 shuttling, thus, generating an asymmetric distribution of each protein in different cellular compartments  
109 (23). In unstressed cells, PER2 mediates p53’s stability by binding p53’s C-terminus and preventing  
110 p53’s ubiquitination of targeted sites by the RING finger-containing E3 ligase *mouse double minute 2*  
111 homolog (MDM2) (22). Remarkably, PER2:p53:MDM2 co-exist as a trimeric and stable complex in the  
112 nuclear compartment, although p53 is released from the complex to become transcriptionally active once  
113 cells experience a genotoxic stimuli (24). As a result, we asked whether PER2 could also act as a *bona*  
114 *fide* substrate for the E3 ligase activity of MDM2 in the absence of p53. Unlike  $\beta$ -TrCP, MDM2 acts as a  
115 scaffold protein to facilitate catalysis by bringing the E2 ubiquitin-conjugating enzyme and substrate  
116 together in a phosphorylation-independent manner (17,25). Our findings show that PER2 directly  
117 interacts with MDM2 opposite to the MDM2’s E3-RING domain and downstream of its p53-binding site.  
118 As a result, PER2 is efficiently ubiquitinated *in vitro* and in cells at numerous sites by MDM2 in a  
119 process that is preferentially mediated by UbcH5a, a robust E2-ubiquitin conjugating enzyme with innate  
120 preference for various polyubiquitin chain linkages (26). Furthermore, MDM2-mediated ubiquitination on  
121 PER2 is independent of phosphorylation. Accordingly, PER2’s half-life is critically modulated by  
122 MDM2’s levels and its enzymatic activity as shown in cells where MDM2’s expression is either enhanced  
123 or silenced and its catalytic activity pharmacologically inhibited. Consequently, direct manipulation of  
124 MDM2 expression influences period length by acting on PER2’s stability. Therefore, our results provide  
125 evidence to advocate for tight control of PER2’s turnover in cells that expand the phosphorylation-centric  
126 view of its degradation.

127

## 128 MATERIALS AND METHODS

### 129 Plasmid constructs

130 The human PER2 (NM\_022817), p53 (NM\_000546), Mdm2 (NM\_002392),  $\beta$ -TrCP1 (NP\_003930), and  
131 CK1 $\epsilon$  (BC006490, Addgene) full-length cDNAs were cloned downstream from a tag encoding sequence  
132 into pCS2+3xFLAG-, and (*myc*)<sub>6</sub>-tag vectors (FLAG-PER2, FLAG-p53, FLAG-MDM2, FLAG- $\beta$ -TrCP,  
133 FLAG- CK1 $\epsilon$ , *myc*-PER2, *myc*-p53, *myc*-Mdm2) modified for ligation-independent cloning (LIC,  
134 Novagen). Various mutants of MDM2 (*e.g.*, MDM2C<sup>470</sup>A) and PER2 (*e.g.*, PER2S<sup>662</sup>A) were generated  
135 from the FLAG- and *myc*-tagged templates, respectively, using QuikChange II site-directed mutagenesis  
136 and following manufacturer's instructions (Agilent). Deletion constructs of MDM2 [MDM2(1-117),  
137 MDM2(117-497), MDM2(1-230), MDM2(230-497), MDM2(1-434), MDM2(434-497)], p53 [p53 $\Delta$ 30,  
138 comprises residues 1-363 in p53], and PER2 [PER2(1-682), PER2(356-872), PER2(683-872), PER2(873-  
139 1,255)] were obtained by PCR amplification and subcloning in either pCS2+3xFLAG- or (*myc*)<sub>6</sub>-tag  
140 vectors. Various lengths of cDNA fragments of PER2 were cloned into the *Sall/NotI* sites of pGEX-4T-3.  
141 Fragments of PER2 comprising residues 1-172, 173-355, 356-574, 575-682, 683-872, 873-1,120, and  
142 1,121-1,255 are referred in the text as: GST-PER2(1-172), GST-PER2(173-355), GST-PER2(356-  
143 574), GST-PER2(575-682), GST-PER2(683-872), GST-PER2(873-1120), GST- PER2(1121-1255),  
144 respectively.

### 145 Bacterial two-hybrid screening

146 The two-hybrid interaction screening was performed using the BacterioMatch II system (Stratagene)  
147 following manufacturer's instructions. A specific bait (pBT-*PER2*) and target plasmid pair from a liver  
148 library (pTRG cDNA library) were co-transformed with the bait vector plus the pTRG target vector.  
149 Selection was performed as indicated in (22) and positive colonies were transferred from selective  
150 screening medium onto a dual selective screening medium plate containing 3-amino-1,2,4-triazole (3-AT)  
151 and streptomycin. The pBT-*LFG2*/pTRG-*Gal11*<sup>P</sup> co-transformant was used as a positive control whereas  
152 co-transformation of pBT-*PER2* with either empty pTRG or pTRG-*Gal11*<sup>P</sup> vectors were used as negative  
153 controls. All positive cDNA clones were isolated and sequenced, with some of them already having been  
154 reported, and their interaction functionally verified (22).

### 155 Cell culture, transient transfections, and treatments

156 Human colorectal carcinoma HCT116 [*TP53*(+/+), *PER2*(+/+)] and human non-small cell lung carcinoma  
157 H1299 cell lines were purchased from the American Type Culture Collection (ATCC) and propagated  
158 according to manufacturer's recommendations. The H1299 cells contained a homozygous partial deletion  
159 of the *TP53* gene that results in the absence of p53 expression. The HCT116 null-isogenic clone [*TP53*(-/-  
160 ), *PER2*(+/+)] was purchased from GRCF Biorepository and Cell Center (Johns Hopkins School of

161 Medicine) and maintained in McCoy's 5A modified medium containing 10% Fetal Bovine Serum (FBS),  
162 50 U/ml of penicillin and 50 µg/ml of streptomycin. The MEF<sup>mPer2::LUC</sup> cells (kind gift of S. Kojima,  
163 Virginia Tech) were cultured in Dulbecco's Modified Eagle's Medium (DMEM, 4.5 g/l glucose)  
164 supplemented with 10% fetal bovine serum (FBS), 50 U/ml of penicillin, and 50 µg/ml of streptomycin,  
165 and maintained at 37°C and 5% CO<sub>2</sub>.

166 Plasmid transfections were performed at 50-80% cell confluency and optimized using Lipofectamine  
167 LTX (Invitrogen) and HyClone HyQ-RS reduced serum medium (GE Healthcare) following  
168 manufacturer's instructions. Proteins were allowed to express for several hours before cells were either  
169 harvested or circadian synchronized. Synchronization was by serum shock (27) or dexamethasone  
170 treatment (28). Lysates were from cells collected at the indicated times, with t=0 occurring just prior to  
171 cycloheximide (CHX, 100 µg/ml) addition.

172 For siRNA transfections, HCT116 p53<sup>+/+</sup> cells were grown in McCoy's 5A media containing 10% FBS,  
173 penicillin (50 U/ml), and streptomycin (50 µg/ml) until reaching 60-80% confluency. Knockdown was  
174 optimized using Dharmafect 2 reagent (GE Dharmacon) to deliver siRNAs targeting either MDM2 (5'-  
175 GAGATTTGTTTGGCGTGCCAAGCTT-3') or β-TrCP1 (5'-  
176 CGGAAACTCTCAGCAAGCTATGAAA-3') following manufacturer's instructions. A scramble siRNA  
177 sequence with no homology to any known mammalian gene, served as control. Forty-eight hours after  
178 transfection, cells were serum shocked for 2 h after which the media was replaced with a serum-free  
179 version and cycloheximide was added. Samples were collected at different times after treatment and  
180 extracts were prepared in NP-40 lysis buffer containing 10 mM Tris-HCl (pH 7.5), 137 mM NaCl, 1mM  
181 EDTA, 10% glycerol, 0.5% NP-40, 80 mM β-glycerophosphate, 1mM Na<sub>3</sub>VO<sub>4</sub>, 10 mM NaF, and  
182 protease inhibitors (10 µM leupeptin, 1 µM aprotinin A, and 0.4 µM pepstatin).

183 Lastly, endogenous levels of PER2 were monitored in HCT116 cells treated with CHX and incubated  
184 with sempervirine nitrate (named SN, 1µg/ml, ChromaDex Inc.), PF670462 (named PF670, 0.1µM or  
185 1µM, Cayman Chemical Co.), or a combination of both inhibitors throughout the time course analyzed.  
186 The vehicle (DMSO) was used as control.

### 187 **Immunoprecipitation and immunoblot assays**

188 Immunoprecipitation of protein complexes were from either transfected cell extracts or *in vitro* binding  
189 reactions. Unless indicated, proteins were in NP-40 lysis buffer, and extracts (0.5-1 mg) were incubated  
190 by rotation for either α-FLAG M2 agarose beads (Sigma-Aldrich) or α-myc (9E10) beads (Santa Cruz  
191 Biotechnology) for either 2 h or overnight at 4°C, respectively. In other cases, immunoprecipitations were  
192 carried out in a two-step procedure with extracts first being incubated with an uncoupled antibody (α-  
193 FLAG, α-myc, or α-PER2) overnight at 4°C before the addition of protein A beads (50% slurry; Sigma-

194 Aldrich). Bound beads were washed four times with wash buffer (20 mM Tris-HCl (pH 7.5), 100 mM  
195 NaCl, 5 mM EDTA, 0.1% Triton X-100, and 0.5 mM PMSF) before the addition of Laemmli buffer.  
196 Complexes were resolved by SDS-PAGE and immunoblotting using the specific antibodies indicated in  
197 each case. Primary antibodies were  $\alpha$ -FLAG (Sigma-Aldrich),  $\alpha$ -myc (Santa Cruz Biotechnology),  $\alpha$ -  
198 PER2 (Sigma-Aldrich),  $\alpha$ -MDM2 (Santa Cruz Biotechnology),  $\alpha$ - $\beta$ -TrCP1 (Cell Signaling Technology),  
199  $\alpha$ -p53 (DO1 clone, Santa Cruz Biotechnology), and  $\alpha$ -ubiquitin (Enzo Life Sciences). Secondary  
200 antibodies were horseradish peroxidase-conjugated  $\alpha$ -rabbit or  $\alpha$ -mouse IgGs (Invitrogen) and  
201 chemiluminescence reactions were performed using the SuperSignal West Pico Substrate (Pierce).

### 202 **In vitro binding and epitope blocking assays**

203 *In vitro* transcription and translation of either pCS2+myc- or -FLAG PER2,  $\beta$ -TrCP1,  $\beta$ -TrCP1 $\Delta$ F,  
204 MDM2, MDM2(C<sup>470</sup>A), and p53 were carried out using the SP6 high-yield TNT system (Promega)  
205 following manufacturer's instructions. As indicated in each case, aliquots (1-4 $\mu$ l) of the indicated  
206 recombinant proteins were pre-incubated for 15 min at room temperature to allow complex formation  
207 before adding NP-40 lysis buffer. Epitope blocking was performed by pre-incubating *in vitro* the  
208 transcribed and translated FLAG-MDM2(C<sup>470</sup>A) with  $\alpha$ -4B11, -4B2, or -SMP14 antibody (0.1 mg/ml  
209 each, Calbiochem) for 2 h at 4°C before adding recombinant myc-PER2. Binding reactions were allowed  
210 to proceed overnight at 4°C with rotation. In other experiments, binding of myc-MDM2 or -  
211 MDM2(C<sup>470</sup>A) proteins was evaluated in  $\lambda$ PPase [200U (New England Biolabs), 15 min at 25°C]-treated  
212 recombinant FLAG-PER2 samples. Reactions were diluted in NP-40 lysis buffer and complexes were  
213 immunoprecipitated using  $\alpha$ -FLAG antibody (Sigma) and protein A beads (50% slurry) as described  
214 earlier.

### 215 **Protein pull-down assay**

216 Recombinant GST-tagged PER2 proteins were expressed in *E. coli* strain *Rosetta* (Novagen) and purified  
217 using glutathione sepharose affinity chromatography following manufacturer's instructions (GE  
218 Healthcare). Pull-down experiments were carried out using 5  $\mu$ g of each recombinant GST-tagged  
219 protein-bound beads, or an equivalent amount of GST bound glutathione beads as control, and 4  $\mu$ l of *in*  
220 *vitro* transcribed and translated [<sup>35</sup>S]-FLAG-MDM2 in binding buffer containing 20 mM Tris-HCl (pH  
221 7.4), 100 mM NaCl, 5 mM EDTA, and 0.1% Triton X-100. Reactions were incubated for 1 h at 4°C with  
222 rotation, after which, bead-bound complexes were washed with binding buffer containing either low (100  
223 mM) or high (1M) salt concentration. Bound proteins were analyzed by SDS-PAGE and autoradiography.

### 224 **Ubiquitination and degradation assays**

225 Aliquots (1-4  $\mu$ l) of *in vitro* transcribed and translated tagged-proteins [FLAG-, myc-, or myc-DO (DO  
226 epitope sequence is EPPLSQETFSDLWKL)], or a combination of them, were allowed to bind before

227 adding 1x ubiquitination buffer (Enzo Life Sciences), 1 mM dithiothreitol, 20 µg/ml ubiquitin-aldehyde,  
228 600 µg/ml ubiquitin, 1x ATP-energy regeneration system (5 mM ATP/Mg<sup>2+</sup>; Enzo Life Sciences), 40 µM  
229 MG132 (Cayman Chemical Co.), and 1 mg/ml of HeLa S100 lysate fraction (Enzo Life Sciences) or 1xE1  
230 (ubiquitin activating enzyme, Enzo Life Sciences) and 1x UbcH5a, b, or c (human ubiquitin conjugating  
231 enzyme, human Enzo Life Sciences) to a final volume of 10-15 µl. Reactions were then incubated for 1 h  
232 at 37°C in a water bath, except for Supplementary Figure S3B where the incubation time varied as  
233 indicated in the figure. In other experiments, PER2 recombinant proteins were pre-treated with λPPase  
234 [200U (New England Biolabs), 15 min at 25 °C] before the ubiquitination reaction was carried out in the  
235 presence of tagged MDM2 as aforementioned. Following, Laemmli sample buffer was added and  
236 ubiquitinated proteins were either resolved by SDS-PAGE and detected by immunoblotting or  
237 immunoprecipitated following the two-step protocol described in the section above.

238 Detection of ubiquitinated forms of PER2 in cells was carried out by co-transfecting HCT116  
239 [TP53(+/+), PER2(+/+)] cells with pCS2+FLAG-PER2 and either pCS2+myc-MDM2 or pCS2+myc-  
240 MDM2(C470A) plasmids. Cells were maintained in complete media for 24h to allow for the recombinant  
241 proteins' expression before adding MG132 (50 µM) and ubiquitin aldehyde (5 nM). Cells were harvested  
242 4 h later and lysates were immunoprecipitated using α-FLAG antibody as described. Proteins were  
243 resolved by SDS-PAGE and ubiquitinated forms of PER2 were detected by immunoblotting using an α-  
244 ubiquitin antibody.

#### 245 **Homology model generation and protein-protein docking**

246 The I-TASSER Server (29) was used to create homology models of PER2(683-872) wild-type and mutant  
247 variants. Sequences were uploaded to the server in FASTA format. There were no restraints guiding  
248 modeling, homologous templates were not excluded, and secondary structures for specific residues were  
249 unbiased. The server uses templates from the PDB database to predict secondary structure of the query  
250 protein using LOMETS 4 (Local Meta-Threading-Server). Alternatively, the server uses *ab initio*  
251 modeling to assign secondary structures. Clustering is then performed to find the lowest free-energy  
252 model using SPICKER (30). The model with the highest C-score value was then energy minimized using  
253 the Molecular Operating Environment utilizing Amber12EHT parameters and subsequently validated  
254 using online servers including SWISS-MODEL, ProSA, and Verify3D. The models of all three constructs  
255 showed reasonable energies relevant to their Anolea, Procheck, and z-scores, as well as favorable 3D  
256 structure and side chain placements, and were deemed acceptable. Herein, the three models were  
257 validated and used in confidence in further protein-ubiquitin docking experiments.

258 Protein binding interfaces were predicted by docking between ubiquitin [PDB:1UBQ (31)] and each  
259 model of the PER2 fragments. The Schrödinger software suite (2017.2) and the BioLuminate interface,

260 which utilizes the PIPER docking module, were used for interface determination. No biased or interfaced  
261 residue was set at the onset of docking. All PER2 models were treated equally in regard to how and where  
262 ubiquitin molecules were predicted to interact. Thirty structures for each PER2:ubiquitin docking pair  
263 were obtained and clustered using the pairwise root mean square deviation (RMSD) and key residues  
264 located at the interface identified. Data files are available from the Virginia Tech Institutional Data  
265 Repository, VTechData, [doi:10.7294/W4JW8C2R](https://doi.org/10.7294/W4JW8C2R) (DOI to be awarded at publication and deposit).

### 266 **Analysis of protein half-life**

267 Accumulation and half-life of endogenous proteins in HCT116 cell extracts (20-80  $\mu\text{g}$ ) was monitored by  
268 immunoblotting samples collected at different times after CHX addition as indicated in the figure legends.  
269 Protein bands were quantified by immunoblot analysis using Bio-Rad ImageLab 5.1 software/Gel Doc  
270 XR+ system and values were normalized to tubulin levels. Unless indicated, the percentage of remaining  
271 protein was normalized to  $t=0$  and the data fitted using Microsoft Excel.

272 In other experiments, the half-life of PER2 was measured in  $\text{MEF}^{\text{mPer2::LUC}}$  cells by luminescence  
273 recording. Seeded cells were synchronized with dexamethasone (100 nM, 2 h) and maintained in media  
274 containing phenol-red-free DMEM, 50  $\mu\text{M}$  luciferin (Biosynth), 2% FBS, 1% penicillin/streptomycin, 1%  
275 L-glutamine (Invitrogen) in a lumicycle instrument ( $t=0$ h). Addition of CHX (40  $\mu\text{g}/\text{ml}$ ) and DMSO (1%  
276 v/v), PF670462 (1 $\mu\text{M}$ ), SN (1  $\mu\text{g}/\text{ml}$ ), or both inhibitors occurred during rising ( $t=24$ h) or falling ( $t=33$ h)  
277 phases. Three biological experiments were performed in parallel with each treatment being plated in  
278 triplicate. Data were normalized to the PER2::LUC signal from untreated cells. The PER2 half-life was  
279 determined at the time in which PER2::LUC signal was 50% of the initial detected amount as degradation  
280 curves were not exponential.

### 281 **Real-time bioluminescence assays**

282 Cells,  $\text{MEF}^{\text{mPer2::LUC}}$ , were seeded in 35 mm dishes and circadian synchronized by dexamethasone  
283 treatment (100 nM, 2 h). Following media replacement as described above, cells were allowed to stabilize  
284 in a LumiCycle 32-channel automated luminometer (Actimetrics) placed in a 37°C incubator for 24 h  
285 before sempervirine (1 $\mu\text{g}/\text{ml}$ ), PF670462 (0.1 or 1  $\mu\text{M}$ ), or both inhibitors were added. In these assays,  
286 bioluminescence was continuously recorded for at least 5 additional days and data were analyzed using  
287 the LumiCycle analysis software (Actimetrics).

288 In other experiments,  $\text{MEF}^{\text{mPer2::LUC}}$  cells were transiently transfected with either pCS2+*myc-MDM2* or  
289 *siRNA MDM2* for 24 or 48 h, respectively, before dexamethasone synchronization. Following media  
290 exchange, bioluminescence was recorded for at least 5 additional days. In each case, raw data was  
291 collected after dexamethasone synchronization ( $t=0$ ) and for the remainder of the experiment. Raw data  
292 beginning  $t=24$  h after synchronization was considered when calculating the circadian period length.

293 Period length was calculated using the Lumicycle data analysis software (Actimetrics). For all  
294 experiments, mean and errors were calculated based on at least triplicates.  
295



## 296 RESULTS

297 In vertebrates, phosphorylation-dependent  $\beta$ -TrCP-mediated ubiquitination and proteasomal degradation  
298 provides a means of regulating endogenous levels of PER2 in the cell and, thus, its daily accumulation  
299 [for review see (8)]. A large body of evidence supports a more central role for PER2 as the integrator of  
300 intracellular signals and as a sensor of environmental conditions. Thus, much effort has been devoted to  
301 understanding how various phosphorylation events determine PER2's degradation rate (8-10,32,33)  
302 whereas other phosphorylation-independent mechanisms of degradation have remained largely  
303 unexplored. Building on our previous finding that PER2 forms a stable complex with p53 and MDM2  
304 (22,24), we evaluated whether the RING E3 ligase provides an alternative route for degradation of PER2  
305 that is independent of phosphorylation and, at the same time, influences the circadian period.

### 306 The oncogenic E3 ligase MDM2 interacts with PER2 in the absence of p53

307 Herein, and using a bacterial two-hybrid system, we report the identification of the human MDM2  
308 homolog as a direct interactor of PER2 suggesting that, in addition to the already identified  
309 PER2:p53:MDM2 nuclear complex (24), PER2:MDM2 might exist as its own entity and that this  
310 association might be independent of p53 binding (Figure 1A). Consequently, we then evaluated the  
311 presence of the PER2:MDM2 complex in cells lacking endogenous expression of p53. Initial experiments  
312 were carried out using colorectal HCT116 cells [*TP53*(+/+), *PER2*(+/+); named HCT116<sup>p53+/+</sup> hereafter]  
313 and, to avoid confounding variables, its null-isogenic HCT116 cell variant lacking p53 expression  
314 [*TP53*(-/-), *PER2*(+/+); named HCT116<sup>p53-/-</sup> hereafter] (34). As p53 and MDM2 form a regulatory  
315 feedback loop in which p53 transcriptionally up-regulates MDM2 expression, cells lacking p53 protein  
316 usually exhibit constitutively low levels of MDM2 expression, which is enhanced by MDM2's self-  
317 ubiquitination activity and increased turnover [for review see (35)]. To circumvent this problem,  
318 HCT116<sup>p53-/-</sup> cells were transfected with *myc*-tagged MDM2 and PER2:MDM2 association was detected  
319 by immunoprecipitation of endogenous PER2 (Figure 1B). Accordingly,  $\alpha$ -PER2, but not control IgG,  
320 antibody brings down PER2-associated MDM2 in both HCT116<sup>p53+/+</sup> and HCT116<sup>p53-/-</sup>, further supporting  
321 their p53-independent interaction. Similar results were obtained using a human non-small cell lung  
322 carcinoma line (H1299) that possesses a homozygous partial deletion of the *TP53* gene. In this case,  
323 complexes were detected in cells co-transfected with *myc*-PER2 and FLAG-MDM2, its ubiquitin ligase  
324 activity-deficient mutant FLAG-MDM2(C<sup>470</sup>A) (36), or the E3 ligase  $\beta$ -TrCP1 (Supplementary Figure  
325 S1A). These results prompted us to map the region of binding between PER2 and MDM2 to better  
326 understand the interplay among these molecules.

327 Epitope mapping was carried out by pre-incubating recombinant FLAG-MDM2(C<sup>470</sup>A) with various  
328 epitope-specific antibodies that recognize native conformations in MDM2 [(37), 4B2: residues 19 to 59;



329 SMP14: residues 154 to 167; 4B11: residues 383 to 491 (comprises the RING domain)] before adding  
330 recombinant *myc*-PER2 (Supplementary Figure S1B). As shown in Figure 1C, pre-incubation with the  $\alpha$ -  
331 MDM2 clone SMP14 completely abolished PER2 binding, suggesting that the epitope comprising  
332 residues 154-167 in MDM2 is critical for the stability of the PER2:MDM2 interaction. Accordingly,  
333 immunoprecipitation of FLAG-MDM2 recombinant proteins engineered to include various functional  
334 domains confirmed that the N-terminus hydrophobic pocket in MDM2 (residues 1 to ~110) is dispensable  
335 for PER2 recognition, even though contacts besides the SMP14 epitope exist between PER2 and MDM2  
336 (Supplementary Figure S1C). Conversely, pull-down experiments using various recombinant GST-  
337 expressed fragments of PER2 [named GST-PER2 (1-172), GST-PER2 (173-355), GST-PER2 (356-574),  
338 GST-PER2 (575-682), GST-PER2 (683-872), GST-PER2 (873-1,120), GST-PER2 (1,121-1,255)] and  
339 [<sup>35</sup>S]-MDM2 showed that association primarily occurs at the C-terminus of the PER2 PAS domain,  
340 residues 356 to 574, and in a further inward region (residues 683 to 872) that is heavily post-  
341 translationally modified (Figure 1D). Overall, our findings establish the existence of a PER2:MDM2  
342 complex whose association is independent of the presence of p53, suggesting that E3 ligases other than  $\beta$ -  
343 TrCP may be acting on PER2.

#### 344 **Period 2 is a *bona fide* substrate of MDM2**

345 As PER2 binds MDM2 opposite its RING domain, we asked whether MDM2's catalytic activity could  
346 result in PER2 ubiquitination. To test this possibility, we evaluated PER2 ubiquitination in a cell-free  
347 system enriched in E1 and E2 enzymes containing *in vitro* transcribed and translated FLAG-MDM2 or  
348 FLAG-MDM2(C<sup>470</sup>A) and multi-tagged *myc*-DO-PER2 proteins (Figure 2A). Our data showed that  
349 ubiquitinated forms of PER2, depicted as a high molecular weight ladder, were distinguishable when the  
350 substrate was incubated in the presence of wild-type MDM2, but not its ligase-deficient mutant form  
351 (Figure 2A, lanes 2 vs. 3). Similarly, ubiquitinated forms of PER2 were detected in immunoprecipitated  
352 samples from *in vitro* reactions performed in the presence of FLAG-ubiquitin (Supplementary Figure  
353 S2A) and from lysates where co-transfected cells were maintained in the presence of the proteasome  
354 inhibitor MG132 (Supplementary Figure 2B).

355 Next, we asked whether ubiquitin modifications in PER2 were confined to specific domains in the  
356 protein. We turned our attention to three relevant regions in PER2: *i*) the N-terminus PAS domain and its  
357 C-terminus extension (residues 1-682), which is responsible for PER2's role as a transcriptional regulator,  
358 *ii*) a middle region, heavily post-translationally modified, largely involved in protein-protein interactions  
359 and in cellular shuttling of PER2 (residues 356-872), and *iii*) a C-terminus fragment (873-1,255), which is  
360 known to directly interact with various ligands and with PER2's counterpart CRY (38,39) (Figure 2B and  
361 Supplementary Figure S2C). To this end, we reconstituted a functional E1/E2/MDM2 or MDM2(C<sup>470</sup>A)

362 ubiquitin ligase *in vitro* system and used various recombinantly-expressed tagged fragments of PER2 as  
363 substrates. Results showed that PER2(1-682), PER2(356-872), and PER2(873-1,255) were able to  
364 incorporate multiple ubiquitin moieties when incubated with wild-type MDM2, but not MDM2(C<sup>470</sup>A), as  
365 it is depicted by the presence of a ladder in immunoblots (Figure 2B, lanes 2 vs. 3 and 5 vs. 6 and  
366 Supplementary Figure S2C, lane 2 vs. 3, *right arrows*).

367 We previously established that residues within the center region of PER2 lay at the interface of its  
368 interaction with p53 and facilitate the formation of a stable complex where circadian and checkpoint  
369 signals converge (22,24). Thus, we turned our attention to defining ubiquitination events taking place,  
370 specifically, within residues 683 to 872 in PER2.

371 As shown for p53, whereas ubiquitination by MDM2 is influenced by various factors including the  
372 enzyme:substrate ratio, the incorporation of diverse ubiquitin chains in the substrate results from the  
373 multivalent nature of linkage-specific conjugations (40,41). Therefore, we initially optimized the reaction  
374 conditions to ensure targeting of PER2(683-872) by MDM2 was taking place within the initial velocity  
375 region and the ubiquitin conjugation biochemically defined (Supplementary Figure S3). Initially, we  
376 tested scenarios in which the amount of ATP-Mg<sup>2+</sup> chelate (Supplementary Figure 3A), ubiquitin co-  
377 substrate (Supplementary Figure S3A), and time-dependent accumulation of products were varied  
378 (Supplementary Figure S3B).

379 Next, as MDM2 functions with various E2 ubiquitin-conjugating enzymes from the UbcH5 family (a, b,  
380 and c) to mediate either specific ubiquitin linkages or more promiscuous ones in different substrates (41),  
381 we tested the relevance of UbcH5 specificity for MDM2-mediated ubiquitination of PER2(683-872)  
382 (Supplementary Figure S3C, *left panel*). *In vitro* ubiquitination reactions were performed using  
383 recombinant enzymes (E1 and UbcH5a-c) and tagged MDM2, MDM2(C<sup>470</sup>A), and PER2(683-872)  
384 substrates. The p53 protein was used as a positive control as it is efficiently modified by MDM2 in the  
385 presence of either ubiquitin conjugated UbcH5 enzyme (Supplementary Figure S3C, *right panel*). Results  
386 showed that all UbcH5 enzymes promoted the addition of, at least, a single ubiquitin molecule and that  
387 UbcH5a appeared to be more effective in catalyzing the incorporation of at least a second molecule  
388 (Supplementary Figure S3C, *left panel*). Among the eight possible ubiquitin linkages, UbcH5a displays  
389 selectivity for Lys<sup>11</sup>, Lys<sup>48</sup>, and Lys<sup>63</sup> in promoting ubiquitin chain initiation (42). Of these, Lys<sup>11</sup> and the  
390 canonical Lys<sup>48</sup> linkages were involved in the formation of poly-ubiquitin chains and proteasome-  
391 mediated turnover whereas the Lys<sup>63</sup> linkage plays a non-degradative role and is usually involved in  
392 protein recruitment and localization (42). Lastly, we confirmed a dose-dependent effect of MDM2 in the  
393 accumulation of slower-migrating poly-ubiquitinated forms of PER2(683-872) that were undetectable  
394 when the reaction took place in the presence of MDM2(C<sup>470</sup>A), (Figure 2C). Thus, our results allude to

395 the existence of early ubiquitination events within PER2 from which poly-ubiquitination chains can be  
396 built upon.

### 397 **Binding of p53 to PER2 abrogates MDM2-mediated ubiquitination**

398 To gain further insight into the role that MDM2 plays in PER2 function, we focused our efforts on  
399 identifying relevant Lys residues that could be targeted for modification. A highly conserved cluster of  
400 Lys residues (K<sup>789</sup>, K<sup>790</sup>, K<sup>793</sup>, K<sup>796</sup>, K<sup>798</sup>, K<sup>800</sup>, K<sup>803</sup>) mapping within PER2(683-872) was targeted for  
401 mutagenesis (Supplementary Figure S4A and B) and recombinant proteins were subjected to *in vitro*  
402 ubiquitination in the presence of MDM2 or MDM2(C<sup>470</sup>A) (Figure 3). As shown in Figure 3A,  
403 PER2(683-872) is efficiently ubiquitinated by MDM2 (lanes 1-3); however, a form of PER2(683-872) in  
404 which all conserved Lys residues were substituted with Ala, named PER2(683-872)-KA (Supplementary  
405 Figure S4A), was not targeted for modification (lane 6). This result directly signals that one or more of its  
406 Lys residues is a putative target for MDM2-mediated ubiquitination in this fragment (Figure 3A, lanes 3  
407 vs. 6).

408 To gain further insight into the relevance of cluster residues for ubiquitination to take place, two different  
409 constructs of PER2(683-872) were generated in which substitutions of K<sup>789</sup>A, K<sup>790</sup>A, K<sup>793</sup>A, and K<sup>796</sup>A  
410 were only in PER2(683-872)-KA-WT whereas K<sup>798</sup>A, K<sup>800</sup>A, and K<sup>803</sup>A were solely incorporated into  
411 PER2(683-872)-WT-KA (Supplementary Figure S4B). Ubiquitination results showed that, whereas the  
412 addition of ubiquitin moieties was reduced in PER2(683-872)-WT-KA, incorporation was completely  
413 abrogated in PER2(683-872)-KA-WT (Figure 3A, lanes 3 vs. 4 and 5). Although this result might imply  
414 that ubiquitination events occur primarily within the upstream mutated Lys residues in PER2(683-872)-  
415 KA-WT, we cannot rule out other scenarios including orderly addition of ubiquitin moieties and structural  
416 rearrangements, phenotypes that might be disrupted as a result of a single mutation.

417 To provide insights into possible scenarios, we generated and validated molecular models of PER2(683-  
418 872) wild-type, PER2(683-872)-WT-KA, and PER2(683-872)-KA-WT, and carried out unbiased protein-  
419 protein docking simulations to predict binding interfaces for ubiquitin molecules in each PER2 fragment  
420 (Figure 3B). Unbiased protein-protein docking results strongly favored the placement of a ubiquitin  
421 molecule within the K<sup>798</sup>-K<sup>803</sup> domain with the C-terminus ubiquitin-end making direct contact with K<sup>800</sup>  
422 (Figure 3B, panel *i*). Indeed, modeling and docking predictions in PER2(683-872)-WT-KA suggest that a  
423 conformational change would occur and, thus, none of the remaining Lys residues in the fragment, except  
424 for K<sup>750</sup> (outside the two clusters), would be accessible for ubiquitination (Figure 3B, panel *ii*). These  
425 findings arise from the analysis of major cluster hits for each protein-ubiquitin docking simulation, the  
426 identification of the two most dominant ubiquitin interface poses (both ubiquitin poses are shown in dark

427 blue in each model, Figure 3B, panels *ii* and *iii*), and the comparison of conformational states that show  
428 differences between PER2(683-872) and the -WT-KA and/or -KA-WT interfaces.

429 Modeling results also predicted that it would be unlikely for PER2(683-872)-KA-WT to be ubiquitinated  
430 in any Lys residue as a dramatic conformational change precludes the access of ubiquitin to a reactive Lys  
431 residue (Figure 3B, panel *iii*). We carried out alanine (Ala) scanning at selected positions by site-directed  
432 mutagenesis and determined the contribution of specific Lys residues to PER2 ubiquitination  
433 (Supplementary Figure S4C). In agreement with the predicted models and protein-ubiquitin docking  
434 results, overall levels of ubiquitination were reduced when single residues, instead of clusters, were  
435 replaced by Ala. This was shown more conspicuously for the cases of K<sup>789,790,796,800</sup> (Supplementary  
436 Figure S4C). Further support of our molecular model resulted from ubiquitination experiments carried out  
437 using constructs of PER2(683-872) wild type and -WT-KA, where each had the K<sup>750</sup>A mutation  
438 (Supplementary Figure S4D). Whereas the former showed a reduction in its ubiquitination status  
439 compared to wild-type PER2(683-872), post-translational modification was, as predicted, completely  
440 abrogated in the latter (Supplementary Figure S4D).

441 We previously showed that residues 683 to 872 in PER2 are involved in binding of p53 (22,24) and, now,  
442 that a cluster of Lys residues within that region is targeted for MDM2-mediated ubiquitination (Figure  
443 2B). Consequently, we next asked whether binding of p53 to PER2 could prevent PER2 from being  
444 ubiquitinated by MDM2 at the interface of PER2 association with p53. To address this question, we  
445 carried out a two-step ubiquitination reaction in which PER2(683-872) was initially incubated with a  
446 shorter recombinant version of p53, named p53 $\Delta$ 30 (Figure 3C). We chose to work with p53 $\Delta$ 30 because  
447 it lacks the 30 C-terminal residues targeted for ubiquitination by MDM2 but still binds PER2 (22,43)].  
448 Data showed that addition of increasing amounts of p53 $\Delta$ 30, but not an unrelated protein (GST), to  
449 PER2(683-872) gradually decreased MDM2-mediated ubiquitination of the PER2 fragment in the pre-  
450 bound complex (Figure 3C). These results further expand the original model in which formation of  
451 MDM2:PER2:p53 was proposed to favor p53 stability (24) to include a role for p53 itself in maintaining  
452 the integrity of the trimeric complex by preventing PER2 ubiquitination at the interface of their binding.

#### 453 **MDM2-mediated binding and ubiquitination of PER2 is independent of substrate phosphorylation**

454 Phosphorylation of mouse PER2 on Ser<sup>478</sup> (Ser<sup>480</sup> in human PER2) by CK1 $\epsilon/\delta$  is a prerequisite for  $\beta$ -  
455 TrCP binding and subsequent ubiquitination (15,18); whereas, and despite of its relevance in PER2  
456 stability, priming phosphorylation in Ser<sup>659</sup> (Ser<sup>662</sup> in human PER2) and downstream sites are not directly  
457 involved in  $\beta$ -TrCP-mediated degradation (9,14,44). Therefore, we asked whether phosphorylation in  
458 PER2 is required for MDM2 binding and/or for MDM2 to exert its ubiquitination activity.

459 Initial binding experiments were performed *in vitro* using recombinantly-tagged proteins in the presence  
460 of  $\lambda$ PPase, a promiscuous phosphatase enzyme with activity towards phosphorylated serine, threonine,  
461 and tyrosine residues in proteins. As shown in Figure 4A, PER2 treatment with  $\lambda$ PPase did not abrogate  
462 binding to either MDM2 or MDM2(C<sup>470</sup>A); thus, neither phosphorylation in PER2 nor MDM2 E3 ligase  
463 activity are a prerequisite for the PER2:MDM2 complex to form. We then specifically ruled out the  
464 contribution of CK1 $\epsilon/\delta$  for PER2 and MDM2 binding by immunoprecipitating the endogenous  
465 PER2:MDM2 complex from HCT116 p53<sup>+/+</sup> cells treated with PF-670462 [named PF670 hereafter, (45)],  
466 a specific CK1 $\epsilon/\delta$  inhibitor with proven effect on circadian rhythms (9,46) (Figure 4B). We asked  
467 whether modification in the critical PER2 Ser<sup>662</sup> priming site plays a role in PER2-binding to MDM2 and  
468  $\beta$ -TrCP1 ligases. As shown in Supplementary Figure S5A, MDM2 binding to PER2 is independent of  
469 priming modifications in Ser<sup>662</sup> as both PER2 forms, the wild-type and S<sup>662</sup>A mutant, bound MDM2 to the  
470 same extent in co-transfected H1299 cells (Supplementary Figure S5A). Further support resulted from  
471 immunoprecipitation experiments in which *in vitro* transcribed and translated proteins were allowed to  
472 form complexes in HeLa cell extracts before immunoprecipitation. As expected, the S<sup>662</sup>A mutation did  
473 not compromise  $\beta$ -TrCP1 binding to PER2 as this site is only relevant to the priming kinase site  
474 (Supplementary Figure S5B).

475 Next, we asked whether the phosphorylation interplay between the Ser<sup>480</sup> and Ser<sup>662</sup> sites would impact  
476 the distribution of MDM2 bound to PER2 as previously reported to be the case for  $\beta$ -TrCP1 (9). To  
477 explore this scenario, HCT116<sup>p53+/+</sup> cells were co-transfected with *myc*-CK1 $\epsilon$  and FLAG-PER2, FLAG-  
478 PER2(S<sup>480</sup>A), PER2(S<sup>662</sup>A), or PER2(S<sup>662</sup>D, mimics phosphorylation in S<sup>662</sup>) constructs and proteins were  
479 allowed to express in the presence or absence of the proteasome inhibitor MG132 (Figure 4C). In all  
480 cases, FLAG-tagged proteins were immunoprecipitated and endogenous MDM2 and  $\beta$ -TrCP1 bound  
481 proteins were detected by immunoblotting. As expected, lower migrating forms of PER2 were detected  
482 when co-expressed with CK1 $\epsilon$ , a characteristic feature of phosphorylated proteins. In agreement with  
483 Figure 4A and B, endogenous MDM2, but not endogenous  $\beta$ -TrCP1, were identified bound to PER2  
484 regardless of CK1 $\epsilon$  expression (Figure 4C, lanes 1, 2, 5, and 6). As expected,  $\beta$ -TrCP1 was only detected  
485 bound to PER2 when CK1 $\epsilon$  was expressed and the proteasome inhibited (Figure 4C, lanes 2 *vs.* 6),  
486 whereas its binding was compromised when the Ser<sup>480</sup> motif in PER2 was altered (Figure 4C, lanes 6 *vs.*  
487 8). Of note, despite the fact that MDM2 and  $\beta$ -TrCP1 were both detected associated to FLAG-PER2 in  
488 this assay (Figure 4C, lane 6), our result does not necessarily imply the existence of a trimeric complex  
489 that includes each E3 ligase as they can independently associate to PER2 and be simultaneously  
490 immunoprecipitated. Our data show MDM2 bound PER2(S<sup>662</sup>A) and PER2(S<sup>662</sup>D) to the same extent  
491 confirming that PER2 priming is negligible for MDM2 recognition (Figure 4C, lanes 13-16). As is the



492 case for  $\beta$ -TrCP1, mutation in Ser<sup>662</sup> favors a larger accumulation of MDM2 protein associated to PER2  
493 (e.g., Figure 4C, lanes 5-6 vs. 13-14); however, unlike in the case of  $\beta$ -TrCP in which a larger recruitment  
494 of this ligase is associated to a phosphoswitch in PER2 (9), we speculate that greater MDM2 association  
495 might result from a structural rearrangement in both forms of mutant PER2. In summary, our results  
496 support a model in which recognition of PER2 by MDM2 is independent of phosphorylation in general  
497 and in particular by CK1 $\epsilon$  and that neither the Ser<sup>480</sup> nor Ser<sup>662</sup> phospho-cluster plays a direct role in their  
498 recognition.

499 We also tested whether CK1 $\epsilon$ -mediated phosphorylation was, instead, a pre-requisite for PER2  
500 ubiquitination to occur (Supplementary Figure S5C). To evaluate this possibility, we performed a two-  
501 step *in vitro* ubiquitination reaction in which the substrate, *myc*-PER2(683-872) was first incubated with  
502 FLAG-CK1 $\epsilon$  to allow for phosphorylation to occur and then the modified substrate was purified by  
503 affinity chromatography before the ubiquitination reaction was carried out in the presence of FLAG-  
504 MDM2 (Supplementary Figure S5C, lanes 2-5). Recombinant p53 was used as a control in this  
505 experiment (Supplementary Figure S5C, lanes 10-13). As shown, ubiquitination of *myc*-PER2(683-872)  
506 was neither abrogated by CK1 $\epsilon$ -mediated phosphorylation nor CK1 $\epsilon$  binding (Supplementary Figure S5C,  
507 lanes 2-9). Pre-treatment of CK1 $\epsilon$  with PF670 inhibited the kinase's activity but not its binding capacity  
508 to *myc*-PER2(683-872), and yet, ubiquitination still occurred (Supplementary Figure S5C, lanes 6-9).

509 To rule out the contribution of phosphorylation events other than those mediated by CK1 $\epsilon$  for  
510 ubiquitination, *in vitro* reactions were carried out following treatment of various recombinant PER2  
511 fragment proteins with  $\lambda$ PPase. As shown for the case of PER2(356-872) and PER2(683-872), and in  
512 both Figure 4D and Supplementary Figure S5D, none of the treatments caused a discernible effect in the  
513 ubiquitination activity of MDM2 towards its substrate. Lastly, we confirmed binding of CK1 $\epsilon$  to *myc*-  
514 PER2(356-872) did not sterically block MDM2-mediated ubiquitination of the PER2 fragment  
515 (Supplementary Figure S5E). Thus, MDM2-mediated ubiquitination and PER2 phosphorylation seem to  
516 follow parallel post-translational paths during PER2's accumulation in the nucleus.

### 517 **MDM2 directly modulates PER2 turnover in cells**

518 As polyubiquitination in proteins is likely a signal for proteasome degradation, we then asked whether  
519 MDM2-mediated activity towards PER2 impacts PER2's half-life. Cells, HCT116<sup>p53+/+</sup>, were transfected  
520 with FLAG-MDM2 and harvested at different times after being treated with cycloheximide (CHX), an  
521 inhibitor of protein biosynthesis previously used to estimate the half-life of other core clock proteins  
522 (23,47). Analysis of cell lysates showed that endogenous levels of PER2 were remarkably reduced shortly  
523 after CHX addition in samples overexpressing MDM2 (Figure 5A, *upper panel*), shortening PER2's half-  
524 life ~2-fold (Figure 5A, *right graph*). We speculated that a decrease in endogenous MDM2 levels would

525 favor PER2 stability and prolong its half-life, mirroring the effect of  $\beta$ -TrCP1 downregulation on PER2  
526 levels. To test this hypothesis, we transfected HCT116<sup>p53+/+</sup> cells, which express both MDM2 and  $\beta$ -  
527 TrCP1, with *siRNA* targeting either E3 ligase. Lysates were collected at various times after CHX addition  
528 and examined for the expression of endogenous levels of PER2, MDM2, and  $\beta$ -TrCP1 by immunoblotting  
529 (Figure 5B). Results unmasked two distinct, yet related, features associated with PER2 levels as *siRNA*  
530 treatment seemed to influence both PER2's accumulation and stability (Figure 5B, *upper two panels*  
531 *represent different exposures of the same blot*). First, overall endogenous levels of PER2 increased, albeit  
532 at different levels, as a result of knocking down either E3 ligase before CHX addition (Figure 5B, lanes 1  
533 vs. 7 and 13). Quantitative analysis showed an ~2-fold increase in *siMDM2* vs. *si $\beta$ -TrCP1* treatments and  
534 an ~ 3-fold increase difference compared to mock samples (Figure 5B, lanes 1, 7, and 13 and  
535 Supplementary Figure S6). Second, a qualitative assessment of PER2 levels under similar scenarios  
536 showed that depletion of either MDM2 or  $\beta$ -TrCP1 stabilized PER2 largely to the same extent (Figure  
537 5B, lanes 7-12 vs. 13-18). Overall, our results emphasize the existence of an alternative mode of  
538 regulation of PER2 stability.

### 539 **Regulation of PER2 stability by MDM2 occurs along the circadian cycle**

540 Next, we asked whether the activity of MDM2 is relevant to PER2 stability during each rising and falling  
541 phase of the circadian cycle. Here, we measured real-time bioluminescent rhythms in mouse embryonic  
542 fibroblast (MEF) cells in which the mouse *PER2* gene (*mPer2*) was *knocked-in* and the luciferase gene  
543 inserted downstream [named MEF<sup>mPer2::LUC</sup> hereafter, (48)]. Studies confirmed that MEF<sup>mPer2::LUC</sup> cells  
544 maintained robust rhythms in luciferase activity for several days and the mPer2::LUC fusion protein  
545 showed rhythms of accumulation and posttranslational modifications that mirrored those described *in vivo*  
546 (48,49).

547 First, degradation of mPER2::LUC was monitored by bioluminescence recordings in cells treated with  
548 CHX and sempervirine nitrate, a compound that specifically inhibits the ubiquitin ligase activity of  
549 MDM2 [named SN hereafter, (50,51)] at either rising ( $t_1$ ) or falling phases ( $t_2$ ) (Figures 5C and D).  
550 Inhibition of MDM2 activity resulted in a longer PER2 half-life compared to vehicle (DMSO) suggesting  
551 a role for the E3 ligase in modulating PER2 stability in both circadian phases [Figures 5C and D;  
552  $t_1$ (DMSO vs. SN, in h):  $2.89 \pm 0.049$  vs.  $4.29 \pm 0.269$   $p < 0.005$  and  $t_2$ (DMSO vs. SN, in h):  $2.47 \pm 0.130$   
553 vs.  $3.58 \pm 0.300$   $p < 0.005$ ]. As expected, an increase in PER2's half-life was noticeable when cells were  
554 treated with PF670 as CK1 $\delta/\epsilon$ -mediated phosphorylation of Ser<sup>480</sup> is precluded and, therefore,  $\beta$ -TrCP1  
555 was unable to recognize its substrate [Figures 5C and D;  $t_1$ (DMSO vs. PF670, in h):  $2.89 \pm 0.049$  vs.  $3.85$   
556  $\pm 0.049$ ,  $p < 0.005$  and  $t_2$ (DMSO vs. PF670, in h):  $2.47 \pm 0.130$  vs.  $3.39 \pm 0.255$ ,  $p < 0.005$  and (15)]. These

557 results establish the relevance of MDM2 activity for modulating PER2 stability during the accumulation  
558 and degradation phases of the circadian cycle.

559 We then evaluated how SN and PF670 treatments compared to each other in terms of mPER2::LUC  
560 stability in both rising and falling phases (Figure 5C). Results showed a marginal, but consistent,  
561 significant increase in mPER2::LUC half-life between SN and PF670 treatments only when administered  
562 during the rising phase [Figures 5C and D;  $t_1$ (PF670 vs. SN, in h):  $3.85 \pm 0.049$  vs.  $4.29 \pm 0.269$ ,  $p < 0.05$   
563 and  $t_2$ (PF670 vs. SN, in h):  $3.39 \pm 0.255$  vs.  $3.58 \pm 0.300$ , n.s.]. In this context, our results suggest that  
564 MDM2 and  $\beta$ -TrCP are both needed during the circadian accumulation phase of PER2 but might have  
565 redundant roles during the falling phase where no significant difference in PER2 half-life was observed  
566 between treatments. Consequently, it seemed relevant to explore the contribution of CK1 $\epsilon/\delta$  for PER2  
567 accumulation in the context of MDM2 activity.

568 Cells, MEF<sup>mPer2::LUC</sup>, were then incubated with a combination of SN and PF670 inhibitors in the presence  
569 of CHX as described in the Methods section. Remarkably, the addition of both inhibitors had a synergistic  
570 effect on the stability of mPER2::LUC when compared to the sole addition of PF670, but not SN, in  
571 either phase [Figure 5C;  $t_1$ (PF670 vs. PF670+SN, in h):  $3.85 \pm 0.049$  vs.  $4.72 \pm 0.191$ ,  $p < 0.05$  and  
572  $t_2$ (PF670 vs. PF670+SN, in h):  $3.39 \pm 0.255$  vs.  $4.09 \pm 0.147$ ,  $p < 0.05$ ]. Overall, our data supports a model  
573 where PER2 stability depends, *a priori*, on the interplay between both E3 ligases.

#### 574 **MDM2's function is required to maintain circadian period**

575 Maintenance of circadian oscillations relies on the expression of the rate-limiting component PER2 for  
576 the formation of a functional PER2:CRY inhibitory complex (49). Therefore, we hypothesized that  
577 alterations in PER2 stability that result from tuning MDM2's levels or activity should impact the length  
578 of the circadian period.

579 Our initial studies focused on measuring the period length of the circadian oscillator in MEF<sup>mPer2::LUC</sup> cells  
580 in which MDM2's level was either augmented by its overexpression or silenced by *siRNA* targeting  
581 (Figures 6A and B and Supplementary Figures S7A and C). As expected from our biochemical findings  
582 (Figure 5), synchronized MEF<sup>mPer2::LUC</sup> cells overexpressing MDM2 exhibited a shorter period length  
583 ( $25.20 \pm 0.100$  h vs.  $24.53 \pm 0.05$  h,  $p < 0.005$ ) compared to mock-transfected cells (Figure 6A and  
584 Supplementary Figure 7E). Furthermore, transfections of MEF<sup>mPer2::LUC</sup> with increasing amounts of *myc*-  
585 MDM2 significantly resulted in a dose-dependent shortening of circadian period length by up to ~1.5h  
586 even at low levels of *myc*-MDM2 transfection (Supplementary Figure 7B), suggesting that a tight  
587 regulation of MDM2 needs to be maintained under physiological conditions to ensure proper oscillation.  
588 Next, we challenged the model by hypothesizing that knockdown expression of MDM2 by *siRNA*  
589 transfection (named siMDM2) of MEF<sup>mPer2::LUC</sup> cells should result in the converse phenotype and, thus, a



590 lengthened period (Figure 6B and Supplementary Figure 7C). Indeed, our data showed that  
591 downregulation of MDM2 expression resulted in significant lengthening of the circadian period ( $25.50 \pm$   
592  $0.141$  h vs.  $26.75 \pm 0.480$  h,  $p < 0.05$ , Supplementary Figure 6E), confirming the requirement of MDM2  
593 for normal circadian oscillations.

594 Following, MEF<sup>mPer2::LUC</sup> cells were treated with the cell permeable MDM2 inhibitor SN or HLI373 at a  
595 dose that *i*) prevented MDM2 auto-ubiquitination and degradation (51-53), and *ii*) did not affect cell  
596 viability (Supplementary Figures 7D and E). Synchronized MEF<sup>mPer2::LUC</sup> cells were maintained in the  
597 presence of the inhibitor throughout the time course during bioluminescence recording (Figure 6C and  
598 Supplementary Figures S7G). Average bioluminescence rhythms of SN-treated cells show a dramatic  
599 lengthening of the circadian period of  $\sim 2$  h ( $25.35 \pm 0.311$  h vs.  $27.33 \pm 0.340$  h,  $p < 0.0005$ ,  
600 Supplementary Figures 7G), which closely resembled the result obtained when transfecting MEF<sup>mPer2::LUC</sup>  
601 cells with siMDM2 (Figures 6B vs. C), suggesting that control over MDM2's activity remains a major  
602 point of regulation. Similarly, a delay in period length was also observed when MEF<sup>mPer2::LUC</sup> cells were  
603 treated with the HLI373 inhibitor (mock:  $24.97 \pm 0.208$  h, HLI373:  $26.10 \pm 0.283$ , h  $p < 0.05$ ,  
604 Supplementary Figure S7F). Therefore, despite the fact that changes in MDM2 levels influence circadian  
605 oscillations, MDM2's E3 ligase activity is actually the chief contributor to the observed phenotype.

606 Then, we evaluated whether the combined effect of PF670 and HLI373 on PER2 stability results in a  
607 synergistic change in circadian lengthening (Figure 6D). In this scenario, synchronized MEF<sup>mPer2::LUC</sup> cells  
608 were maintained with either inhibitor (PF670 or HLI373) or a combination of both (PF670+ HLI373) and  
609 the long-term effect in bioluminescence rhythms were simultaneously recorded throughout the time  
610 course analyzed. In agreement with Figure 5C, and (9) for PF670, treatment of MEF<sup>mPer2::LUC</sup> cells with  
611 HLI373 resulted in a significant increase in circadian period length even a low concentrations (mock:  
612  $25.35 \pm 0.071$  h; HLI373:  $26.10 \pm 0.200$  h; PF670:  $27.53 \pm 0.404$  h, PF670+HLI373:  $29.50 \pm 0.173$  h,  
613 Supplementary Figure S7G). Similarly, treatment of MEF<sup>mPer2::LUC</sup> cells with SN alone or in combination  
614 with PF670, also exhibited period lengthening, further advocating for the specific involvement of  
615 MDM2's activity in circadian oscillation. Our findings showed that, although significant, the effect of  
616 both inhibitors is not additive but synergistic and reflects on the cell's period length. Overall, our data  
617 suggest a model in which both events, ubiquitination of PER2 by MDM2 and PER2 phosphorylation by  
618 CK1 $\epsilon/\delta$ , are relevant to determining the circadian period length despite the appearance that both events  
619 seem, *a priori*, to take place independently of each other.

620

## 621 DISCUSSION

622 Timely degradation of regulatory proteins is essential for most aspects of cellular homeostasis and is  
623 relevant to signaling processes involved in cell growth, proliferation, and survival. It is, therefore, not  
624 surprising that malfunctioning of any aspect of the protein degradation process results in a wide spectrum  
625 of diseases and disorders [for review see (54)]. Because mammalian circadian rhythm also relies on the  
626 continuous cycle of protein synthesis and degradation, it is not exempted from problems associated with  
627 protein turnover dysregulation. Indeed, mice bearing loss-of-function mutations or knock-down  
628 expression in genes encoding ubiquitin-modifying enzymes involved in clock regulation (*e.g.*, *FBXL3*,  
629 *FBXL21*, *FBW1A*, *HUWE1*, *PAM*, *UBE3A*, *SIAH2*) exhibit a phenotype where the free-running period of  
630 locomotor activity is longer, shorter, or dampened [for review see (55)]. As clock components control the  
631 expression of an array of genes involved in multiple cellular mechanisms, it is reasonable to expect that  
632 alteration in their expression and accumulation is linked to various human diseases (56). This brings into  
633 consideration the relevance of PER2, a circadian component whose function lies at the intersection of the  
634 cellular response to DNA-damage (24) and whose turnover depends on its phosphorylation by CK1 $\epsilon/\delta$   
635 and  $\beta$ -TrCP1/2 binding, followed by ubiquitination and proteasomal degradation [see (8) and references  
636 within]. Whereas substantive research has made a compelling case for how PER2 accumulates and how  
637 its level modulates the function of the clock, it poses the question of whether PER2 turnover remains  
638 exclusively a  $\beta$ -TrCP1/2 matter. And, whereas the answer could have certainly been affirmative,  
639 seemingly unnoticed observations suggested to us that alternative scenarios could exist. For example, the  
640 counterintuitive finding that PER2's half-life was reported to be shorter in cultured cells co-expressing the  
641 dominant negative forms of  $\beta$ -TrCP1 and 2 ( $\beta$ -TrCP1 $\Delta$ F and 2  $\Delta$ F) (57), the need for phosphorylation-  
642 independent mechanisms of PER2 degradation to exist to explain its three-stage kinetics of degradation  
643 (9), or the presence of ubiquitinated forms of PER2 in a biological system in which  $\beta$ -TrCP1 and 2 are  
644 knocked down (21). As a result, we turned to our findings that established that PER2 is able to form a  
645 trimeric complex with MDM2 and p53 (22) and asked whether MDM2 might play a role in PER2  
646 stability.

647 Our results show that PER2 binds to MDM2 (PER2:MDM2) in a p53-independent manner *in vitro* and  
648 exists as a readily detectable endogenous complex in various cell settings (Figure 1 and Supplementary  
649 Figure 1). This is a non-trivial finding as, to the best of our knowledge, all well-established E3 ubiquitin  
650 ligases acting on clock components only recognize phosphorylated substrates. This includes, in addition  
651 to  $\beta$ -TrCPs, the E3 ligases FBXL3 and FBXL21, which act on AMPK-mediated phosphorylated CRY1/2  
652 (58), FBXW7, which acts on cyclin-dependent kinase 1-mediated phosphorylated REV-ERB $\alpha$  (59), and a  
653 yet uncharacterized E3 ligase that targets GSK3 $\beta$ -mediated phosphorylated BMAL1 (60). The challenge

654 of identifying novel E3 ubiquitin ligases targeting clock components has led to the development of  
655 screenings that revolve around identifying enzyme-substrate binding or functional interactions (61,62). Of  
656 these, the recent identification of the ubiquitin ligase Siah2, which regulates REV-ERV $\alpha$  turnover, has  
657 been the most promising finding, yet, it belongs to the domain of ligases that recognize phosphorylated  
658 substrates (62).

659 Binding of PER2 to MDM2 occurs in a region distinct from those identified for p53 binding and E3 ligase  
660 activity (Figures 1-2), a result in agreement with the existence of the PER2:MDM2:p53 complex (22).  
661 Next, we established PER2 as a novel substrate of MDM2 and, conversely, MDM2 resulted in a  
662 previously uncharacterized E3 ligase responsible for PER2 ubiquitination (Figure 2). The relevance of  
663 these initial findings lays in the existence of an alternative mechanism to recognize and target PER2 for  
664 degradation that is independent of phosphorylation (Figures 2-4).

665 Binding specificity among E2 enzymes of the UbcH5 family by MDM2 defined the intrinsic preference  
666 for K<sup>11</sup>, K<sup>48</sup>, and K<sup>63</sup> ubiquitin linkages in PER2 resulting in the incorporation of multi-ubiquitin  
667 molecules (Figures 2-3). Docking of K<sup>11,48, and 63</sup> ubiquitin conformations favored elongation and, thus, the  
668 formation of poly-ubiquitinated chains (42). Although the addition of multiple ubiquitination units in  
669 PER2 by MDM2 represents a novel finding among circadian proteins, post-translational modifications of  
670 this nature by MDM2 are not uncommon as shown, for example, in the case of p53 and FOXO4 (40,63).

671 We found that the accumulation and half-life of endogenous PER2 varied in scenarios in which MDM2  
672 levels or activity were modulated, which also altered the cell's circadian period length (Figures 5-6).  
673 These findings raise the question of how MDM2's primary role as a PER2 regulator would fit into the  
674 functioning of the actual mammalian clock mechanism when acting under normal physiological  
675 conditions. This is certainly a difficult question to address, especially considering that MDM2 distribution  
676 in normal cells is largely nuclear, that MDM2 could promote either mono- or poly-ubiquitination of  
677 substrates depending on its endogenous levels, and that rhythmic levels of MDM2 protein and transcripts  
678 are largely absent in unstressed cells [for review see (64) and (23)]. Whereas these well-established  
679 premises create constraints around the possible function of MDM2 within the clock molecular  
680 mechanism, we propose a few scenarios for further consideration. For example, it is possible that, under  
681 physiological conditions, translocation of PER2 to the nucleus would initially result in time-of-day  
682 accumulation of CK1 $\epsilon/\delta$ -dependent phosphorylation events in PER2 that may serve to prime the substrate  
683 first for  $\beta$ -TrCP1/2-mediated degradation and later for MDM2 targeting. Furthermore, it is not uncommon  
684 to find that the generation of polyubiquitination substrates targeted for proteasomal degradation require  
685 both priming of mono-ubiquitinated substrates and intrinsic E3 ligase activity of more than one enzyme as  
686 has been shown, for example, in the case of p53 (65,66).

687 Phosphorylation of PER2 by CK1 $\epsilon/\delta$  either stabilizes or destabilizes the circadian factor depending on the  
688 phosphocluster targeted in PER2, and thus, adjusts the length of the circadian period to diverse  
689 environmental stimuli [*e.g.*, temperature, metabolic signal, (9,11)]. Our findings open the possibility of  
690 PER2's stability being modulated by signals that converge in MDM2, for example, those that respond to  
691 genotoxic and cytotoxic cellular stress, and for which a change in period length might provide a fitness  
692 advantage. Indeed, MDM2's activity can be modulated by post-translational modifications, stability,  
693 localization, or binding and be exquisitely tuned by, for example, alteration in oxygen levels, exposure to  
694 low-dose radiation, and even slight changes in growth factor concentrations (64). Certainly, phase  
695 resetting of the mammalian circadian clock has been shown to occur in response to DNA-damage and  
696 metabolic stress in both cell cultures and animal models, a phenotype that is increasingly associated with  
697 the existence of crosstalk mechanisms between clock proteins and checkpoint components (24,67-69).

698 At this point, the role of MDM2:PER2 interaction in the mammalian system and within any of the  
699 scenarios described above remains largely within the domain of speculation and represents an area of  
700 active research in our laboratory. We expect that mounting biochemical, molecular, and genetic evidence  
701 will provide a conceptual framework within which we can understand how cells relate and respond to  
702 environmental perturbations, no longer in isolation, but in the context of multicellular systems.

703

704 **ACKNOWLEDGEMENTS**

705 This article is dedicated by C.V.F. to the memory of Dr. James Maller, Professor and Howard Hughes  
706 Investigator, a pioneer in the field of cell cycle regulation and a fine mentor. The authors thank Dr. D. G.  
707 S. Capelluto and Dr. J. Tyson for critical reading of the manuscript and all members of the Finkielstein  
708 laboratory for help and discussions. We would also like to thank Dr. Shihoko Kojima for reagents and  
709 advice and Dr. J. Webster for comments and manuscript editing. J.L. performed all experiments and  
710 statistical analyses discussed in this article except those specifically mentioned below. X.Z. carried out  
711 the experiments shown in Figures 3C, 4, 5C-D, 6D, S3B, S4C and D, S5C-E, S6D, and S7D. T.G.  
712 contributed with Figures 2, 3A and C, S2A and C, S3A and C, S4A. L.J. contributed with Figure S7E.  
713 A.B. performed and analyzed the modeling shown in Figure 3B. J.L., X.Z., and J.K.K. analyzed the  
714 overall data and contributed to refining the hypothesis. C.V.F. and J.L. conceived this project. C.V.F.  
715 supervised and coordinated all investigators for the project and wrote the manuscript.

716

717 **FUNDING**

718 This work was supported by the National Science Foundation MCB division (MCB-1517298) and the  
719 Fralin Life Science Institute to C.V.F. and the National Research Foundation of Korea (N01160447) to  
720 J.K.K.

721

722 **REFERENCES**

- 723 1. Masri, S., Cervantes, M. and Sassone-Corsi, P. (2013) The circadian clock and cell cycle:  
724 interconnected biological circuits. *Curr Opin Cell Biol*, 25, 730-734.
- 725 2. Bell-Pedersen, D., Cassone, V.M., Earnest, D.J., Golden, S.S., Hardin, P.E., Thomas, T.L. and  
726 Zoran, M.J. (2005) Circadian rhythms from multiple oscillators: lessons from diverse organisms.  
727 *Nat Rev Genet*, 6, 544-556.
- 728 3. Buhr, E.D. and Takahashi, J.S. (2013) Molecular components of the Mammalian circadian clock.  
729 *Handbook of experimental pharmacology*, 3-27.
- 730 4. Yagita, K., Yamaguchi, S., Tamanini, F., van Der Horst, G.T., Hoeijmakers, J.H., Yasui, A.,  
731 Loros, J.J., Dunlap, J.C. and Okamura, H. (2000) Dimerization and nuclear entry of mPER  
732 proteins in mammalian cells. *Genes Dev*, 14, 1353-1363.
- 733 5. Ripperger, J.A. and Albrecht, U. (2012) The circadian clock component PERIOD2: from  
734 molecular to cerebral functions. *Prog Brain Res*, 199, 233-245.
- 735 6. Lee, H.M., Chen, R., Kim, H., Etchegaray, J.P., Weaver, D.R. and Lee, C. (2011) The period of  
736 the circadian oscillator is primarily determined by the balance between casein kinase 1 and

- 737 protein phosphatase 1. Proceedings of the National Academy of Sciences of the United States of  
738 America, 108, 16451-16456.
- 739 7. Chiu, J.C., Ko, H.W. and Edery, I. (2011) NEMO/NLK phosphorylates PERIOD to initiate a  
740 time-delay phosphorylation circuit that sets circadian clock speed. *Cell*, 145, 357-370.
- 741 8. Gallego, M. and Virshup, D.M. (2007) Post-translational modifications regulate the ticking of the  
742 circadian clock. *Nat Rev Mol Cell Biol*, 8, 139-148.
- 743 9. Zhou, M., Kim, J.K., Eng, G.W., Forger, D.B. and Virshup, D.M. (2015) A Period2  
744 Phosphoswitch Regulates and Temperature Compensates Circadian Period. *Molecular cell*, 60,  
745 77-88.
- 746 10. Kaasik, K., Kivimae, S., Allen, J.J., Chalkley, R.J., Huang, Y., Baer, K., Kissel, H., Burlingame,  
747 A.L., Shokat, K.M., Ptacek, L.J. et al. (2013) Glucose sensor O-GlcNAcylation coordinates with  
748 phosphorylation to regulate circadian clock. *Cell Metab*, 17, 291-302.
- 749 11. D'Alessandro, M., Beesley, S., Kim, J.K., Chen, R., Abich, E., Cheng, W., Yi, P., Takahashi, J.S.  
750 and Lee, C. (2015) A tunable artificial circadian clock in clock-defective mice. *Nature*  
751 *communications*, 6, 8587.
- 752 12. Meng, Q.J., Logunova, L., Maywood, E.S., Gallego, M., Lebiecki, J., Brown, T.M., Sladek, M.,  
753 Semikhodskii, A.S., Glossop, N.R., Piggins, H.D. et al. (2008) Setting clock speed in mammals:  
754 the CK1 epsilon tau mutation in mice accelerates circadian pacemakers by selectively  
755 destabilizing PERIOD proteins. *Neuron*, 58, 78-88.
- 756 13. Lowrey, P.L., Shimomura, K., Antoch, M.P., Yamazaki, S., Zemenides, P.D., Ralph, M.R.,  
757 Menaker, M. and Takahashi, J.S. (2000) Positional syntenic cloning and functional  
758 characterization of the mammalian circadian mutation tau. *Science*, 288, 483-492.
- 759 14. Shanware, N.P., Hutchinson, J.A., Kim, S.H., Zhan, L., Bowler, M.J. and Tibbetts, R.S. (2011)  
760 Casein kinase 1-dependent phosphorylation of familial advanced sleep phase syndrome-  
761 associated residues controls PERIOD 2 stability. *The Journal of biological chemistry*, 286,  
762 12766-12774.
- 763 15. Eide, E.J., Woolf, M.F., Kang, H., Woolf, P., Hurst, W., Camacho, F., Vielhaber, E.L., Giovanni,  
764 A. and Virshup, D.M. (2005) Control of mammalian circadian rhythm by CKIepsilon-regulated  
765 proteasome-mediated PER2 degradation. *Mol Cell Biol*, 25, 2795-2807.
- 766 16. Ohsaki, K., Oishi, K., Kozono, Y., Nakayama, K., Nakayama, K.I. and Ishida, N. (2008) The role  
767 of {beta}-TrCP1 and {beta}-TrCP2 in circadian rhythm generation by mediating degradation of  
768 clock protein PER2. *J Biochem*, 144, 609-618.
- 769 17. Fuchs, S.Y., Spiegelman, V.S. and Kumar, K.G. (2004) The many faces of beta-TrCP E3  
770 ubiquitin ligases: reflections in the magic mirror of cancer. *Oncogene*, 23, 2028-2036.



- 771 18. Shirogane, T., Jin, J., Ang, X.L. and Harper, J.W. (2005) SCFbeta-TRCP controls clock-  
772 dependent transcription via casein kinase 1-dependent degradation of the mammalian period-1  
773 (Per1) protein. *The Journal of biological chemistry*, 280, 26863-26872.
- 774 19. Lee, H., Chen, R., Lee, Y., Yoo, S. and Lee, C. (2009) Essential roles of CKIdelta and  
775 CKIepsilon in the mammalian circadian clock. *Proceedings of the National Academy of Sciences*  
776 *of the United States of America*, 106, 21359-21364.
- 777 20. Walton, K.M., Fisher, K., Rubitski, D., Marconi, M., Meng, Q.J., Sladek, M., Adams, J., Bass,  
778 M., Chandrasekaran, R., Butler, T. et al. (2009) Selective inhibition of casein kinase 1 epsilon  
779 minimally alters circadian clock period. *J Pharmacol Exp Ther*, 330, 430-439.
- 780 21. D'Alessandro, M., Beesley, S., Kim, J.K., Jones, Z., Chen, R., Wi, J., Kyle, K., Vera, D., Pagano,  
781 M., Nowakowski, R. et al. (2017) Stability of Wake-Sleep Cycles Requires Robust Degradation  
782 of the PERIOD Protein. *Curr Biol*.
- 783 22. Gotoh, T., Vila-Caballer, M., Santos, C.S., Liu, J., Yang, J. and Finkielstein, C.V. (2014) The  
784 circadian factor Period 2 modulates p53 stability and transcriptional activity in unstressed cells.  
785 *Molecular biology of the cell*.
- 786 23. Gotoh, T., Kim, J.K., Liu, J., Vila-Caballer, M., Stauffer, P.E., Tyson, J.J. and Finkielstein, C.V.  
787 (2016) Model-driven experimental approach reveals the complex regulatory distribution of p53  
788 by the circadian factor Period 2. *Proceedings of the National Academy of Sciences of the United*  
789 *States of America*, 113, 13516-13521.
- 790 24. Gotoh, T., Vila-Caballer, M., Liu, J., Schiffhauer, S. and Finkielstein, C.V. (2015) Association of  
791 the circadian factor Period 2 to p53 influences p53's function in DNA-damage signaling.  
792 *Molecular biology of the cell*, 26, 359-372.
- 793 25. Berndsen, C.E. and Wolberger, C. (2014) New insights into ubiquitin E3 ligase mechanism. *Nat*  
794 *Struct Mol Biol*, 21, 301-307.
- 795 26. Middleton, A.J., Wright, J.D. and Day, C.L. (2017) Regulation of E2s: A Role for Additional  
796 Ubiquitin Binding Sites? *J Mol Biol*, 429, 3430-3440.
- 797 27. Balsalobre, A., Damiola, F. and Schibler, U. (1998) A serum shock induces circadian gene  
798 expression in mammalian tissue culture cells. *Cell*, 93, 929-937.
- 799 28. Balsalobre, A., Brown, S.A., Marcacci, L., Tronche, F., Kellendonk, C., Reichardt, H.M., Schutz,  
800 G. and Schibler, U. (2000) Resetting of circadian time in peripheral tissues by glucocorticoid  
801 signaling. *Science*, 289, 2344-2347.
- 802 29. Yang, J., Yan, R., Roy, A., Xu, D., Poisson, J. and Zhang, Y. (2015) The I-TASSER Suite:  
803 protein structure and function prediction. *Nat Methods*, 12, 7-8.

- 804 30. Zhang, Y. and Skolnick, J. (2004) SPICKER: a clustering approach to identify near-native protein  
805 folds. *J Comput Chem*, 25, 865-871.
- 806 31. Vijay-Kumar, S., Bugg, C.E. and Cook, W.J. (1987) Structure of ubiquitin refined at 1.8 Å  
807 resolution. *J Mol Biol*, 194, 531-544.
- 808 32. Vanselow, K., Vanselow, J.T., Westermarck, P.O., Reischl, S., Maier, B., Korte, T., Herrmann, A.,  
809 Herzel, H., Schlosser, A. and Kramer, A. (2006) Differential effects of PER2 phosphorylation:  
810 molecular basis for the human familial advanced sleep phase syndrome (FASPS). *Genes &*  
811 *development*, 20, 2660-2672.
- 812 33. Vanselow, K. and Kramer, A. (2007) Role of phosphorylation in the mammalian circadian clock.  
813 *Cold Spring Harb Symp Quant Biol*, 72, 167-176.
- 814 34. Bunz, F., Dutriaux, A., Lengauer, C., Waldman, T., Zhou, S., Brown, J.P., Sedivy, J.M., Kinzler,  
815 K.W. and Vogelstein, B. (1998) Requirement for p53 and p21 to sustain G2 arrest after DNA  
816 damage. *Science*, 282, 1497-1501.
- 817 35. Iwakuma, T. and Lozano, G. (2003) MDM2, an introduction. *Mol Cancer Res*, 1, 993-1000.
- 818 36. Honda, R. and Yasuda, H. (2000) Activity of MDM2, a ubiquitin ligase, toward p53 or itself is  
819 dependent on the RING finger domain of the ligase. *Oncogene*, 19, 1473-1476.
- 820 37. Chen, J., Marechal, V. and Levine, A.J. (1993) Mapping of the p53 and mdm-2 interaction  
821 domains. *Mol Cell Biol*, 13, 4107-4114.
- 822 38. Albrecht, U., Bordon, A., Schmutz, I. and Ripperger, J. (2007) The multiple facets of Per2. *Cold*  
823 *Spring Harb Symp Quant Biol*, 72, 95-104.
- 824 39. Yang, J., Kim, K.D., Lucas, A., Drahos, K.E., Santos, C.S., Mury, S.P., Capelluto, D.G. and  
825 Finkielstein, C.V. (2008) A novel heme-regulatory motif mediates heme-dependent degradation  
826 of the circadian factor period 2. *Mol Cell Biol*, 28, 4697-4711.
- 827 40. Li, M., Brooks, C.L., Wu-Baer, F., Chen, D., Baer, R. and Gu, W. (2003) Mono- versus  
828 polyubiquitination: differential control of p53 fate by Mdm2. *Science*, 302, 1972-1975.
- 829 41. Wenzel, D.M., Stoll, K.E. and Klevit, R.E. (2011) E2s: structurally economical and functionally  
830 replete. *Biochem J*, 433, 31-42.
- 831 42. Ye, Y. and Rape, M. (2009) Building ubiquitin chains: E2 enzymes at work. *Nat Rev Mol Cell*  
832 *Biol*, 10, 755-764.
- 833 43. Kruse, J.P. and Gu, W. (2009) Modes of p53 regulation. *Cell*, 137, 609-622.
- 834 44. Toh, K.L., Jones, C.R., He, Y., Eide, E.J., Hinz, W.A., Virshup, D.M., Ptacek, L.J. and Fu, Y.H.  
835 (2001) An hPer2 phosphorylation site mutation in familial advanced sleep phase syndrome.  
836 *Science*, 291, 1040-1043.



- 837 45. Badura, L., Swanson, T., Adamowicz, W., Adams, J., Cianfrogna, J., Fisher, K., Holland, J.,  
838 Kleiman, R., Nelson, F., Reynolds, L. et al. (2007) An inhibitor of casein kinase I epsilon induces  
839 phase delays in circadian rhythms under free-running and entrained conditions. *J Pharmacol Exp*  
840 *Ther*, 322, 730-738.
- 841 46. Kim, J.K., Forger, D.B., Marconi, M., Wood, D., Doran, A., Wager, T., Chang, C. and Walton,  
842 K.M. (2013) Modeling and validating chronic pharmacological manipulation of circadian  
843 rhythms. *CPT Pharmacometrics Syst Pharmacol*, 2, e57.
- 844 47. Yoo, S.H., Ko, C.H., Lowrey, P.L., Buhr, E.D., Song, E.J., Chang, S., Yoo, O.J., Yamazaki, S.,  
845 Lee, C. and Takahashi, J.S. (2005) A noncanonical E-box enhancer drives mouse *Period2*  
846 circadian oscillations in vivo. *Proceedings of the National Academy of Sciences of the United*  
847 *States of America*, 102, 2608-2613.
- 848 48. Yoo, S.H., Yamazaki, S., Lowrey, P.L., Shimomura, K., Ko, C.H., Buhr, E.D., Sieppka, S.M.,  
849 Hong, H.K., Oh, W.J., Yoo, O.J. et al. (2004) *PERIOD2::LUCIFERASE* real-time reporting of  
850 circadian dynamics reveals persistent circadian oscillations in mouse peripheral tissues.  
851 *Proceedings of the National Academy of Sciences of the United States of America*, 101, 5339-  
852 5346.
- 853 49. Chen, R., Schirmer, A., Lee, Y., Lee, H., Kumar, V., Yoo, S.H., Takahashi, J.S. and Lee, C.  
854 (2009) Rhythmic *PER* abundance defines a critical nodal point for negative feedback within the  
855 circadian clock mechanism. *Molecular cell*, 36, 417-430.
- 856 50. Sasiela, C.A., Stewart, D.H., Kitagaki, J., Safiran, Y.J., Yang, Y., Weissman, A.M., Oberoi, P.,  
857 Davydov, I.V., Goncharova, E., Beutler, J.A. et al. (2008) Identification of inhibitors for MDM2  
858 ubiquitin ligase activity from natural product extracts by a novel high-throughput  
859 electrochemiluminescent screen. *J Biomol Screen*, 13, 229-237.
- 860 51. Clement, J.A., Kitagaki, J., Yang, Y., Saucedo, C.J., O'Keefe, B.R., Weissman, A.M., McKee,  
861 T.C. and McMahon, J.B. (2008) Discovery of new pyridoacridine alkaloids from *Lissoclinum cf.*  
862 *badium* that inhibit the ubiquitin ligase activity of Hdm2 and stabilize p53. *Bioorg Med Chem*,  
863 16, 10022-10028.
- 864 52. Kitagaki, J., Agama, K.K., Pommier, Y., Yang, Y. and Weissman, A.M. (2008) Targeting tumor  
865 cells expressing p53 with a water-soluble inhibitor of Hdm2. *Mol Cancer Ther*, 7, 2445-2454.
- 866 53. Dickens, M.P., Fitzgerald, R. and Fischer, P.M. (2010) Small-molecule inhibitors of MDM2 as  
867 new anticancer therapeutics. *Semin Cancer Biol*, 20, 10-18.
- 868 54. Schwartz, A.L. and Ciechanover, A. (2009) Targeting proteins for destruction by the ubiquitin  
869 system: implications for human pathobiology. *Annu Rev Pharmacol Toxicol*, 49, 73-96.

- 870 55. Stojkovic, K., Wing, S.S. and Cermakian, N. (2014) A central role for ubiquitination within a  
871 circadian clock protein modification code. *Front Mol Neurosci*, 7, 69.
- 872 56. Smolensky, M.H., Hermida, R.C., Reinberg, A., Sackett-Lundeen, L. and Portaluppi, F. (2016)  
873 Circadian disruption: New clinical perspective of disease pathology and basis for  
874 chronotherapeutic intervention. *Chronobiol Int*, 33, 1101-1119.
- 875 57. Ohsaki, K., Oishi, K., Kozono, Y., Nakayama, K., Nakayama, K.I. and Ishida, N. (2008) The role  
876 of {beta}-TrCP1 and {beta}-TrCP2 in circadian rhythm generation by mediating degradation of  
877 clock protein PER2. *J Biochem*, 144, 609-618.
- 878 58. Lamia, K.A., Sachdeva, U.M., DiTacchio, L., Williams, E.C., Alvarez, J.G., Egan, D.F., Vasquez,  
879 D.S., Juguilon, H., Panda, S., Shaw, R.J. et al. (2009) AMPK regulates the circadian clock by  
880 cryptochrome phosphorylation and degradation. *Science*, 326, 437-440.
- 881 59. Zhao, X., Hirota, T., Han, X., Cho, H., Chong, L.W., Lamia, K., Liu, S., Atkins, A.R., Banayo,  
882 E., Liddle, C. et al. (2016) Circadian Amplitude Regulation via FBXW7-Targeted REV-  
883 ERBalpha Degradation. *Cell*, 165, 1644-1657.
- 884 60. Sahar, S., Zocchi, L., Kinoshita, C., Borrelli, E. and Sassone-Corsi, P. (2010) Regulation of  
885 BMAL1 protein stability and circadian function by GSK3beta-mediated phosphorylation. *PLoS*  
886 *One*, 5, e8561.
- 887 61. Ruffner, H., Bauer, A. and Bouwmeester, T. (2007) Human protein-protein interaction networks  
888 and the value for drug discovery. *Drug Discov Today*, 12, 709-716.
- 889 62. DeBruyne, J.P., Baggs, J.E., Sato, T.K. and Hogenesch, J.B. (2015) Ubiquitin ligase Siah2  
890 regulates RevErbalpha degradation and the mammalian circadian clock. *Proceedings of the*  
891 *National Academy of Sciences of the United States of America*, 112, 12420-12425.
- 892 63. Brenkman, A.B., de Keizer, P.L., van den Broek, N.J., Jochemsen, A.G. and Burgering, B.M.  
893 (2008) Mdm2 induces mono-ubiquitination of FOXO4. *PLoS One*, 3, e2819.
- 894 64. Marine, J.C. and Lozano, G. (2010) Mdm2-mediated ubiquitylation: p53 and beyond. *Cell death*  
895 *and differentiation*, 17, 93-102.
- 896 65. Grossman, S.R., Deato, M.E., Brignone, C., Chan, H.M., Kung, A.L., Tagami, H., Nakatani, Y.  
897 and Livingston, D.M. (2003) Polyubiquitination of p53 by a ubiquitin ligase activity of p300.  
898 *Science*, 300, 342-344.
- 899 66. Lai, Z., Ferry, K.V., Diamond, M.A., Wee, K.E., Kim, Y.B., Ma, J., Yang, T., Benfield, P.A.,  
900 Copeland, R.A. and Auger, K.R. (2001) Human mdm2 mediates multiple mono-ubiquitination of  
901 p53 by a mechanism requiring enzyme isomerization. *The Journal of biological chemistry*, 276,  
902 31357-31367.

- 903 67. Oklejewicz, M., Destici, E., Tamanini, F., Hut, R.A., Janssens, R. and van der Horst, G.T. (2008)  
904 Phase resetting of the mammalian circadian clock by DNA damage. *Curr Biol*, 18, 286-291.
- 905 68. Papp, S.J., Huber, A.L., Jordan, S.D., Kriebs, A., Nguyen, M., Moresco, J.J., Yates, J.R. and  
906 Lamia, K.A. (2015) DNA damage shifts circadian clock time via Hausp-dependent Cry1  
907 stabilization. *Elife*, 4.
- 908 69. Gaddameedhi, S., Reardon, J.T., Ye, R., Ozturk, N. and Sancar, A. (2012) Effect of circadian  
909 clock mutations on DNA damage response in mammalian cells. *Cell cycle*, 11, 3481-3491.
- 910  
911

## 912 **FIGURE LEGENDS**

913 **Figure 1. The circadian factor PERIOD 2 (PER2) directly interacts with MDM2.** (A) A bacterial  
914 two-hybrid screening was developed to identify direct protein interactors of PER2 *in vivo* based on  
915 transcriptional activation. Positive clones encoding putative interacting proteins were maintained on LB  
916 tetracycline/chloramphenicol media (Tet/Cam, *upper panel*), and patched in His-dropout selective media  
917 containing either 3-amino-1,2,4-triazole (3-AT, *middle panel*) or 3-AT and streptomycin (Strep, *lower*  
918 *panel*). Patches of co-transformants served as positive (pBT-LFG2 and pTRG-Gal11<sup>P</sup>) and negative  
919 (pBT-PER2 and pTRG empty vector) controls. (B) Extracts from isogenic HCT116 cells (p53<sup>+/+</sup> or p53<sup>-/-</sup>)  
920 were analyzed for the presence of endogenous PER2:MDM2 (*left panels*) or PER2:myc-MDM2 (*right*  
921 *panels*) complexes by immunoprecipitation using  $\alpha$ -PER2 antibody and blotting using the indicated  
922 antibodies. IgG was used as the negative control. (C) Competition experiments were carried out by pre-  
923 incubating FLAG-MDM2(C<sup>470</sup>A) with each of the indicated  $\alpha$ -MDM2 antibodies ( $\alpha$ -4B11, -4B2, -  
924 SMP14) before adding recombinant myc-PER2. Protein binding was monitored in FLAG-bound beads by  
925 immunoblotting. IgG was used as negative control. (D) Pull-down assay was carried out using  
926 recombinant GST-tagged PER2 protein fragments comprising various lengths of PER2 [GST-PER2(1-  
927 172), GST-PER2(173-355), GST-PER2(356-574), GST-PER2(575-682), GST-PER2(683-872), GST-  
928 PER2(873-1,120), GST-PER2(1,121-1,255)], and radiolabeled [<sup>35</sup>S]-MDM2. The GST protein was used  
929 as a negative control. In all cases, molecular weight markers are indicated on the left (kDa). Immunoblot  
930 data from B and C were originated from a single experiment that was repeated three times with similar  
931 results. D was repeated twice.

932 **Figure 2. The E3-ligase MDM2 targets PER2 for ubiquitination.** (A) *In vitro* ubiquitination reactions  
933 were carried out using recombinant transcribed and translated myc-DO-PER2, FLAG-tagged MDM2 or  
934 MDM2(C<sup>470</sup>A) proteins and E1/E2 enzymes as described in Materials and Methods and samples were  
935 analyzed by immunoblotting using  $\alpha$ -tagged antibodies. (B) Fragments of PER2 comprising residues 356-  
936 872 and 873-1,255 were expressed as myc-tagged recombinant proteins, assessed for ubiquitination *in*  
937 *vitro*, and products detected by immunoblotting. (C) *In vitro* ubiquitination reactions were carried out  
938 using various enzyme:substrate ratios in a mix optimized as in Figure S3. Poly-ubiquitination forms of  
939 PER2(683-872) are indicated with a bracket (*upper panel*). Levels of E3 ligases are shown by blotting in  
940 the *lower panel*. In each case, immunoblot data was repeated three times with consistent results.

941 **Figure 3. Residues within the central domain of PER2 are ubiquitinated by MDM2.** (A) *In vitro*  
942 ubiquitination reactions were carried out using recombinant myc-tagged PER2(683-872) mutant proteins  
943 (WT-KA: K<sup>789,790,793,796</sup> are wild-type and K<sup>798</sup>A, K<sup>800</sup>A, K<sup>803</sup>A; KA-WT: K<sup>789</sup>A, K<sup>790</sup>A, K<sup>793</sup>A, K<sup>796</sup>A and  
944 K<sup>798,800,803</sup> are wild-type; KA: K<sup>789,790,793,796,798,800,803</sup>A), UbcH5a, and either FLAG-MDM2 or –

945 MDM2(C<sup>470</sup>A). Reaction products were analyzed by immunoblotting using the indicated antibodies. **(B)**  
946 Cartoon representations of PER2(683-872) wild-type, PER2(683-872)-WT-KA, and PER2(683-872)-KA-  
947 WT (grey, *panels i, ii, and iii, respectively*). Relevant Lys (K) residues are shown as pink sticks, Lys to  
948 Ala mutations are in cyan, and the dominant docked pose of ubiquitin molecules is shown in light blue. In  
949 all cases, the C- and N-terminus of ubiquitin are shown in red and blue spheres, respectively. Simulations  
950 were performed as indicated in Materials and Methods. **(C)** Recombinant *myc*-Per2(683-872) and  
951 increasing amounts of FLAG-p53Δ30 (comprises residues 1 to 363 of wild-type p53) were pre-incubated  
952 and purified before adding (or not, control) FLAG-MDM2. Ubiquitination reactions were allowed to  
953 proceed, and samples were analyzed by immunoblotting (*left and right panels*). To rule out non-specific  
954 inhibition of Per2(683-872) ubiquitination, FLAG-GST was used as a control (*right panel*). In all cases,  
955 molecular weight markers are indicated on the left (kDa), arrows on the right indicate modified forms of  
956 the protein substrate, and inputs were 100%. Immunoblot data from **A** and **C** were originated from a  
957 single experiment that was repeated three times with similar results.

958 **Figure 4. Binding and ubiquitination of PER2 by MDM2 is independent of phosphorylation.** **(A)** *In*  
959 *vitro* transcribed and translated FLAG-PER2 was treated with λPPase and dephosphorylated PER2 was  
960 then incubated with either *myc*-MDM2 or *myc*-MDM2(C<sup>470</sup>A) in the presence of binding buffer as  
961 indicated in Materials and Methods. Complexes were purified by affinity chromatography and proteins  
962 visualized by immunoblotting. **(B)** Extracts (1 mg) from HCT116 p53<sup>+/+</sup> cells treated (or not, control)  
963 with PF670 inhibitor (1 μM) overnight were immunoprecipitated with α-PER2 antibody (or IgG, control)  
964 and protein A-beads. Complexes were resolved by SDS-PAGE and immunoblotting as indicated. Inputs  
965 correspond to aliquots (~100 μg) of total extracts. Asterisk indicates a non-specific band. **(C)** Cells,  
966 HCT116<sup>p53+/+</sup>, were co-transfected with either empty vector (pCS2+ control, -) or pCS2+*myc*-CK1ε and  
967 pCS2+3xFLAG-PER2, -PER2(S<sup>480</sup>A), -PER2(S<sup>662</sup>A), or -PER2(S<sup>662</sup>D). Cells were treated with MG-132  
968 (50 μM, +MG-132 and +MG) or vehicle (control, - MG-132 and -MG) for 4 h before harvesting. Protein  
969 complexes were immunoprecipitated using α-FLAG antibody and protein A beads (50% slurry) and  
970 samples blotted for endogenous proteins using the indicated antibodies. IgG was used as negative control.  
971 **(D)** *In vitro* transcribed and translated *myc*-PER2(356-872) and p53 were treated with λPPase before  
972 carrying out the ubiquitination reaction in the presence or absence (control) of FLAG-MDM2. Reaction  
973 products were analyzed by immunoblotting using α-tag antibodies. FLAG-p53 was used as positive  
974 control. In all cases, circled “+” symbol indicates proteins added at last. Molecular weight markers are  
975 indicated on the left (kDa), arrows on the right indicate modified forms of the protein substrate, and  
976 inputs were 100% unless otherwise indicated. Immunoblot data were originated from a single experiment  
977 that was repeated twice with similar results.

978 **Figure 5. MDM2 modulates PER2 turnover.** (A) HCT116 cells were transfected with either empty  
979 vector (mock) or FLAG-MDM2 and proteins were allowed to express for 24h before adding  
980 cycloheximide (CHX, 100 µg/ml, t=0h). Cells were harvested at different times after CHX addition and  
981 extracts were analyzed for endogenous PER2 and MDM2, and FLAG-MDM2 levels by immunoblotting  
982 using specific antibodies as indicated on the left. Tubulin was a loading control (*lower panel*). Protein  
983 levels of PER2 were quantified using ImageJ Software v1.45 and values normalized to tubulin levels  
984 (*right panel*). Immunostaining intensity was plotted as the mean ± SD from three independent  
985 experiments. The curve was fitted using Microsoft Excel. (B) HCT116 cells were transfected with si-  
986 MDM2 (25 nM), si-β-TrCP1 (25 nM), or a scrambled siRNA sequence (mock) for 48 h before CHX  
987 addition (t=0) as described in Materials and Methods. Cells were harvested at different times after CHX  
988 addition and extracts were analyzed for the expression of endogenous PER2 (short and long exposures are  
989 shown in the *upper two panels*), MDM2, and β-TrCP1 by immunoblotting. Tubulin was a loading control  
990 (*lower panel*). (C) Real-time bioluminescence recording were carried out in circadian synchronized  
991 MEF<sup>mPer2::LUC</sup> cells maintained for 24h (t1) or 33h (t2) in luciferin-containing media before adding  
992 together CHX (40 µg/ml) and DMSO, sempervirine (SN, 1µg/ml), PF670462 (PF670, 1 µM), or a  
993 combination of inhibitors. Treatments were performed in triplicate and recordings continue for ~30h after  
994 the addition of inhibitors. Data were normalized to PER2::LUC abundance immediately prior to drug  
995 addition. Mean PER2 half-life is shown ± SD. Significance levels were determined by Student's t test  
996 between two groups (\*\*\* when  $p < 0.005$ , \*\* when  $p < 0.05$ , n.s. means no significant). (D) Summary of  
997 PER2 protein half-life values obtained under various conditions as described in (C) and their statistical  
998 significance as determined by t-test.

999 **Figure 6. The activity of MDM2 influences the length of the circadian period.** (A) MEF<sup>mPer2::LUC</sup> cells  
1000 were transfected with either pCS2+*-myc* (mock) or pCS2+*-myc*-MDM2 and proteins were allowed to  
1001 express for 24h before cells were circadian synchronized. Abundance of PER2::LUC was monitored by  
1002 bioluminescence for 7 days as described in Materials and Methods (*left panel*). In other experiments,  
1003 MEF<sup>mPer2::LUC</sup> cells were transfected with *siMDM2* [(B), a scramble siRNA was used as mock control] or  
1004 treated with sempervirine [SN, 1µg/ml, (C)] before synchronization and maintained after. (D)  
1005 Synchronized MEF<sup>mPer2::LUC</sup> cells were incubated with HLI373 (5µM), PF670462 (PF670, 0.1 µM), or a  
1006 combination of both inhibitors. Cells were maintained with inhibitors at all times during data collection.  
1007 Biological replicates were carried out in triplicate. For A-D, bar graphs indicate the length of the circadian  
1008 period calculated using the LumiCycle analysis software (Actimetrics). The vehicle, DMSO, was used as  
1009 control (mock). Values are the mean ± SD from three independent experiments. Statistical significance  
1010 was determined by t-test. \*\*\* $p \leq 0.005$ , \*\* $p \leq 0.05$ .

1011



1012 **SUPPLEMENTARY FIGURE LEGENDS**

1013 **Figure S1. *In vitro* binding studies of MDM2.** (A) H1299 cells were co-transfected with pCS2+*myc*-  
1014 PER2, FLAG-MDM2, FLAG-MDM2(C<sup>470</sup>A), or FLAG- $\beta$ -TrCP1 and extracts were immunoprecipitated  
1015 and bound proteins analyzed by immunoblotting using specific antibodies. (B) Schematic representation  
1016 of MDM2 constructs [Uniprot ID: Q00987-11, MDM2(1-117), MDM2(1-230), MDM2(1-434),  
1017 MDM2(117-497), MDM2(230-497), MDM2(434-497)] used in binding mapping experiments. All  
1018 MDM2 constructs encode an N-terminus FLAG-tag. Structural and functional domains in MDM2 are  
1019 indicated as boxes in the full-length representation. NES, nuclear export signal; NLS, nuclear localization  
1020 signal. Epitope mapping of specific MDM2 antibodies are indicated as: 4B2, comprises residues 19-50;  
1021 SMP14, comprises residues 154-167; and 4B11, comprises residues 383-491. (C) *In vitro* transcribed and  
1022 translated FLAG-MDM2 recombinant proteins were incubated with *myc*-PER2 and the complex was  
1023 allowed to form before samples were immunoprecipitated using  $\alpha$ -FLAG antibody and protein A beads as  
1024 indicated in Materials and Methods. The complex was then washed with increasing concentration of NaCl  
1025 (100 mM, 250 mM, and 500 mM) and bound PER2 was detected using  $\alpha$ -*myc* antibody. In all cases,  
1026 molecular weight markers are indicated on the left (kDa). Asterisk indicates non-specific band. Unless  
1027 indicated, all experiments were repeated at least twice with similar results.

1028 **Figure S2. Identification of ubiquitinated forms of PER2 in cells.** (A) *In vitro* ubiquitination reactions  
1029 were carried out using recombinant tagged full-length PER2 and MDM2/MDM2(C<sup>470</sup>A) proteins in the  
1030 presence of FLAG-ubiquitin and E1/E2 ubiquitin enzymes. Reactions were allowed to proceed and the  
1031 modified PER2 substrate was purified by immunoprecipitation. Samples were resolved by SDS-PAGE  
1032 and immunoblotted using  $\alpha$ -FLAG (*upper panel*) or  $\alpha$ -*myc* antibodies (*middle and lower panels*). (B)  
1033 Cells, HCT116<sup>p53+/+</sup>, were co-transfected with FLAG-PER2, *myc*-MDM2, *myc*-MDM2(C<sup>470</sup>A), or empty  
1034 vector (control, -) and maintained in the presence (+) or absence (-) of MG132. Cells were harvested and  
1035 PER2 ubiquitination detected by immunoprecipitation using  $\alpha$ -FLAG antibody and immunoblotting with  
1036  $\alpha$ -ubiquitin (*upper panel*),  $\alpha$ -PER2 (*middle panel*), or  $\alpha$ -*myc* (*lower panel*) antibodies. (C) An *in vitro*  
1037 transcribed and translated *myc*-tagged fragment of PER2 comprising residues 1-682 was assessed for  
1038 ubiquitination *in vitro* using either FLAG-MDM2 or -MDM2(C<sup>470</sup>A) ligases. Products were identified by  
1039 immunoblotting using the indicated antibodies. Inputs were 100%. Bracket indicates ubiquitinated forms  
1040 of PER2(1-682). In all cases, molecular weight markers are indicated on the left (kDa). Asterisk indicates  
1041 non-specific band.

1042 **Figure S3. PER2's ubiquitination is tightly regulated by MDM2.** (A) The *in vitro* ubiquitination  
1043 reaction of *myc*-PER2(683-872) by FLAG-MDM2 was optimized for the levels of its co-factor and co-  
1044 substrate, ATP and ubiquitin, to maximize the incorporation of ubiquitin moieties. The *myc*-PER2(683-



1045 872):FLAG-MDM2 complex was allowed to form before adding the ubiquitin mix containing different 1-  
1046 to 3-fold level increases of ATP and/or ubiquitin as described in Materials and Methods using UbcH5a as  
1047 E2 enzyme. Ubiquitinated forms of *myc*-PER2(683-872) were detected using  $\alpha$ -*myc* antibody (*upper*  
1048 *panel*) and levels of FLAG-MDM2 confirmed by immunoblotting using  $\alpha$ -FLAG antibody (*lower panel*).  
1049 **(B)** A time-course *in vitro* ubiquitination assay was carried out using the condition optimized in **(A)** and  
1050 either FLAG-MDM2 or FLAG-MDM2(C<sup>470</sup>A) enzymes. Samples were taken before incubation (t=0) and  
1051 at various times after as indicated. Ubiquitinated forms of the substrate were detected by immunoblotting  
1052 using  $\alpha$ -*myc* antibody (*upper panel*). Levels of each form of E3 ligase were assessed by blotting using  $\alpha$ -  
1053 FLAG (*middle and lower panels*). **(C) Left panel.** Recombinant *myc*-PER2(683-872) was subject to  
1054 ubiquitination in a reaction containing E1, one of the indicated forms of E2 enzyme UbcH5 (a, b, c), and  
1055 either FLAG-MDM2 or -MDM2(C<sup>470</sup>A) and the products were analyzed by immunoblotting. The FLAG-  
1056 p53 substrate was included as control (*right panel*). Poly-ubiquitinated forms of p53 are indicated  
1057 between brackets on the right. Arrows on the right indicate substrate modification, and molecular weight  
1058 markers are indicated on the left (kDa).

1059 **Figure S4. Identification of putative ubiquitination sites within the PER2 central domain.** **(A)**  
1060 Sequence alignment of a central region of the human PER2 protein corresponding to residues 789 to 806  
1061 (*H. sapiens*, Accession NP\_073728) with a comparable region from *M. musculus* (Accession  
1062 NP\_035196), *R. norvegicus* (Accession NP\_113866), *B. Taurus* (Accession XP\_589710), *G. gallus*  
1063 (Accession NP\_989593), *D. rerio* (Accession NP\_878277), and *X. laevis* (Accession NP\_001081098).  
1064 **(B)** Table summarizing all seven conserved Lys residues (K<sup>789</sup>, K<sup>790</sup>, K<sup>793</sup>, K<sup>796</sup>, K<sup>798</sup>, K<sup>800</sup>, K<sup>803</sup>) mutated  
1065 to Ala (indicated as A) in the four different constructs (WT, WT-KA, KA-WT, KA) used for the assay in  
1066 Figure 3A. (-) indicates Lys remains as wild-type residue. **(C)** *In vitro* ubiquitination reactions were  
1067 carried out using recombinant forms of *myc*-PER2(683-872) where single Lys residues were substituted  
1068 by Ala. Reactions were allowed to proceed in the presence of wild-type MDM2 or its enzymatically  
1069 inactive form MDM2(C<sup>470</sup>A). **(D)** Reactions were as in **(C)** except two substrates bearing an additional  
1070 mutation K<sup>750</sup>A, *myc*-PER2(683-872)-K<sup>750</sup>A and *myc*-PER2(683-872)-WT-KA-K<sup>750</sup>A, were included in  
1071 the assay. Arrows on the right indicate substrate modification, and molecular weight markers are  
1072 indicated on the left (kDa).

1073 **Figure S5. Ubiquitination of the central domain of PER2 is independent of phosphorylation.** **(A)**  
1074 H1299 cells were co-transfected with pCS2+*myc*-PER2, *myc*-PER2(S<sup>662</sup>A), pCS2+3xFLAG-MDM2, or  
1075 3xFLAG-MDM2(C<sup>470</sup>A). Cell extracts were incubated with  $\alpha$ -FLAG antibody and protein A beads (50%  
1076 slurry) and bound proteins were identified by immunoblotting using  $\alpha$ -tag antibodies. **(B)** *In vitro*  
1077 transcribed and translated tagged proteins (lanes 1 to 4) were mixed and complexes allowed to form

1078 before immunoprecipitation. Bound components were identified by immunoblotting using the indicated  
1079 antibodies. (C) Phosphorylation of *myc*-PER2(683-872) was carried out in a two-step process in which  
1080 the recombinant PER2 protein was pre-incubated with FLAG-CK1 $\epsilon$  and the phosphorylated substrate was  
1081 subjected to ubiquitination using FLAG-MDM2. In other reactions, FLAG-CK1 $\epsilon$  was pre-incubated with  
1082 PF670 before adding the components to the kinase reaction. Products were analyzed by immunoblotting  
1083 using specific antibodies. DMSO was a vehicle control. Circled “+” symbol indicates proteins added at  
1084 last and after the immunoprecipitated complex was purified and washed. FLAG-p53 was used as positive  
1085 control. (D) Recombinant *myc*-Per2(683-872) was incubated (or not, control) with lambda phosphatase  
1086 ( $\lambda$ PPase, 400U/ $\mu$ l) to remove any phosphate group incorporated in *myc*-Per2(683-872) before adding  
1087 FLAG-MDM2 (indicated as a circled “+”). Ubiquitination reactions were carried out and products  
1088 resolved as indicated in Materials and Methods using  $\alpha$ -*myc* (upper panels) or  $\alpha$ -FLAG antibodies (lower  
1089 panel). (E) The *myc*-Per2(356-872) recombinant protein was pre-incubated with increasing amounts of  
1090 CK1 $\epsilon$  and the complexes were allowed to form before the ubiquitination reaction was carried out in the  
1091 presence of FLAG-MDM2. In all cases, arrows on the right indicate ubiquitinated forms of each fragment  
1092 and molecular weight markers are indicated on the left (kDa). Unless indicated, inputs were 100%.  
1093 Immunoblot data were originated from a single experiment that was repeated twice times with similar  
1094 results.

1095 **Figure S6. Quantification of endogenous protein levels.** Protein levels of PER2, MDM2, and  $\beta$ -TrCP1  
1096 were quantified using ImageJ Software v1.45 from the experiment depicted in Figure 5B and values  
1097 normalized to tubulin levels. Immunostaining intensity was plotted as the mean  $\pm$  SD from three  
1098 independent experiments.

1099 **Figure S7. MDM2’s level and activity influence circadian period length.** (A) In a parallel set of  
1100 dishes, pCS2+*myc*-MDM2 transfected MEF<sup>mPer2::LUC</sup> cells were monitored for either PER2::LUC  
1101 luminescence activity (Figure 6A) or MDM2 protein expression. MDM2 was detected in lysates (40  $\mu$ g)  
1102 24 h after transfection (t=-2), 2h after dexamethasone treatment (t=0), and at various times after  
1103 synchronization (t=24, 40, 40.5, and 52 h) by immunoblotting using an  $\alpha$ -*myc* antibody. “Mock” indicates  
1104 cells transfected with empty plasmid. (B) MEF<sup>mPer2::LUC</sup> cells were transfected with various amounts of  
1105 pCS2+-*myc*-MDM2, synchronized with dexamethasone, and monitored for luminescence activity over  
1106 time (left panel). The circadian period length for each treatment was determined using LumiCycle  
1107 analysis software (right panel). (C) Knockdown expression of MDM2 in MEF<sup>mPer2::LUC</sup> cells was  
1108 confirmed by immunoblotting of lysates collected 24 and 48 h after siMDM2 transfection (25 nM),  
1109 following dexamethasone addition (t=0), and at different times after synchronization (t=72 and 96 h). (D)  
1110 Cell viability was assayed in MEF<sup>mPer2::LUC</sup> cells incubated with different concentrations of sempervirine

1111 (SN) for up to 7 days using the MTT cell viability kit and following manufacturer's instructions  
1112 (ThermoFisher). Values are the mean  $\pm$  SD from three independent experiments repeated in triplicate. **(E)**  
1113 Cell viability test was performed as in **(D)** but using the HLI373 inhibitor (5  $\mu$ M) instead. Values are the  
1114 mean  $\pm$  SD from three independent experiments repeated in triplicate. **(F)** Synchronized MEF<sup>mPer2::LUC</sup>  
1115 cells were incubated with HLI373 (5  $\mu$ M) and maintained with the inhibitor at all times during data  
1116 collection. The circadian period length was calculated using the LumiCycle analysis software  
1117 (Actimetrics). DMSO was used as control (mock). **(G)** Summary of circadian period length data obtained  
1118 from the various treatment modalities included in Figure 6. Values are the mean  $\pm$  SD from three  
1119 independent experiments. Statistical significance between two groups was determined by t-test.  
1120

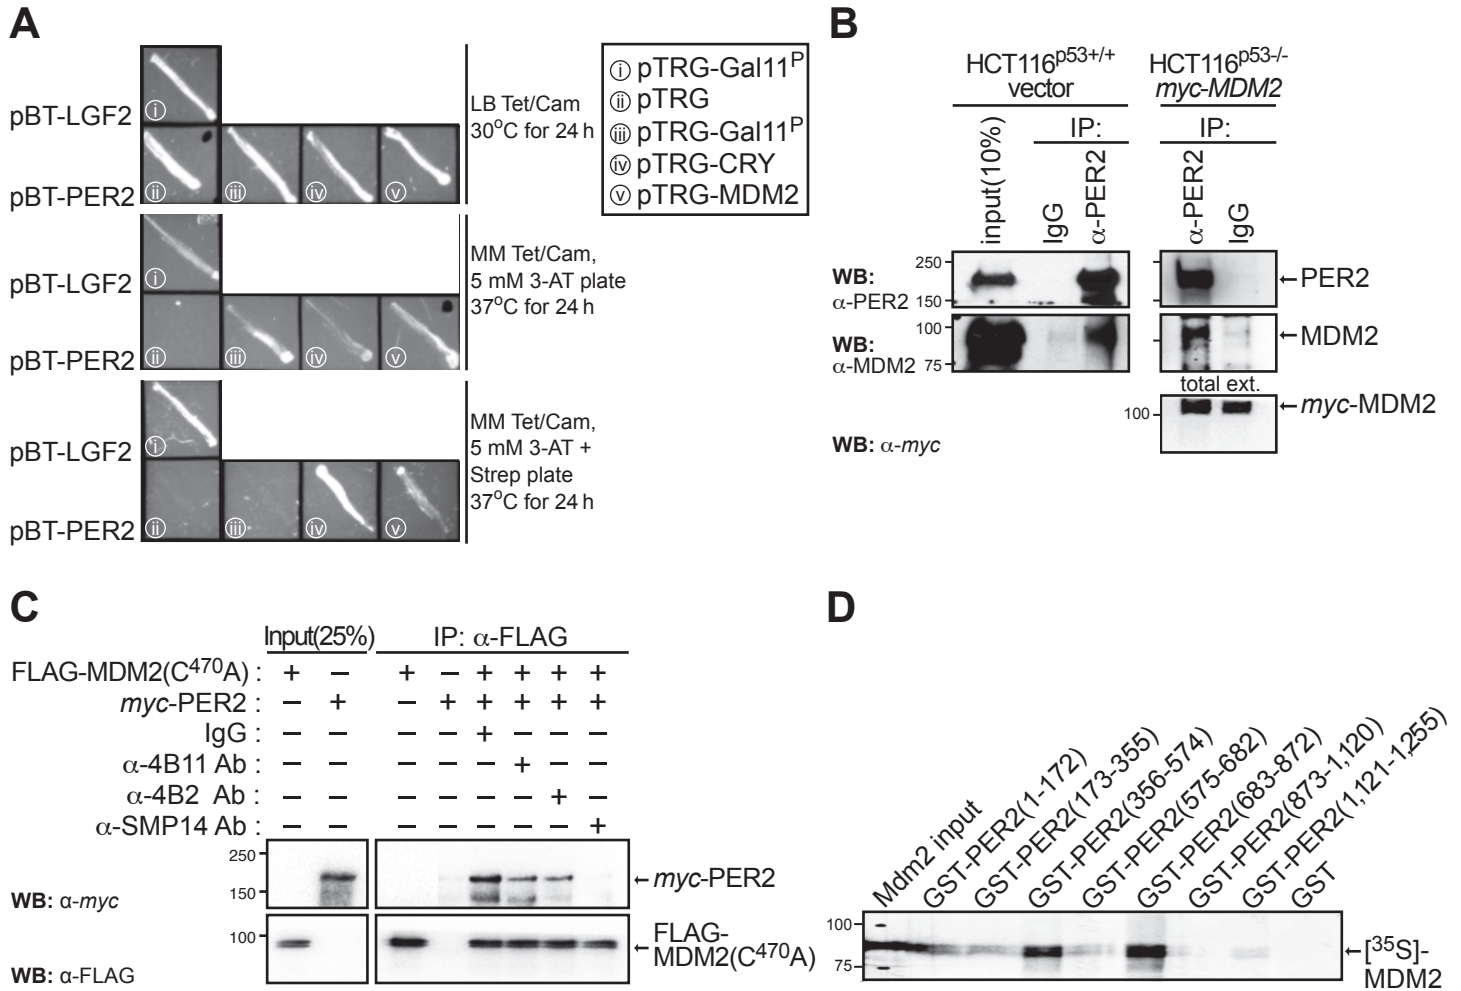

**A**

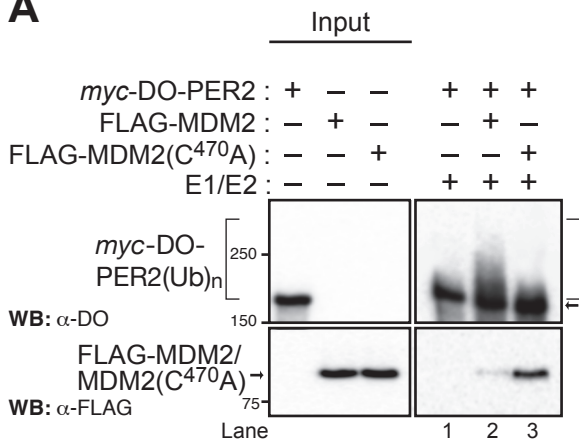

**B**

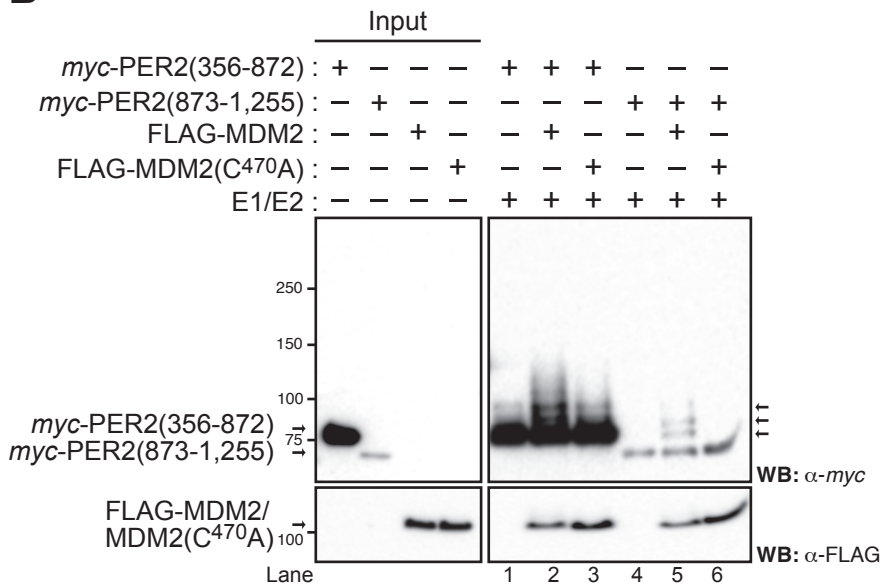

**C**

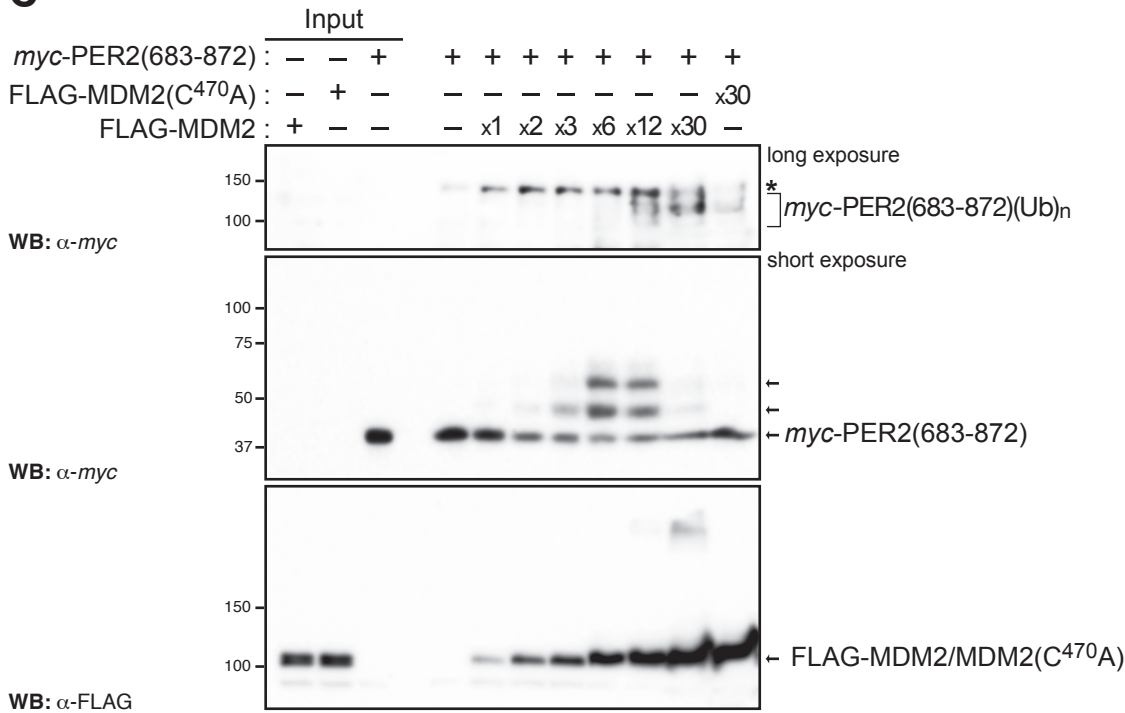

**A**

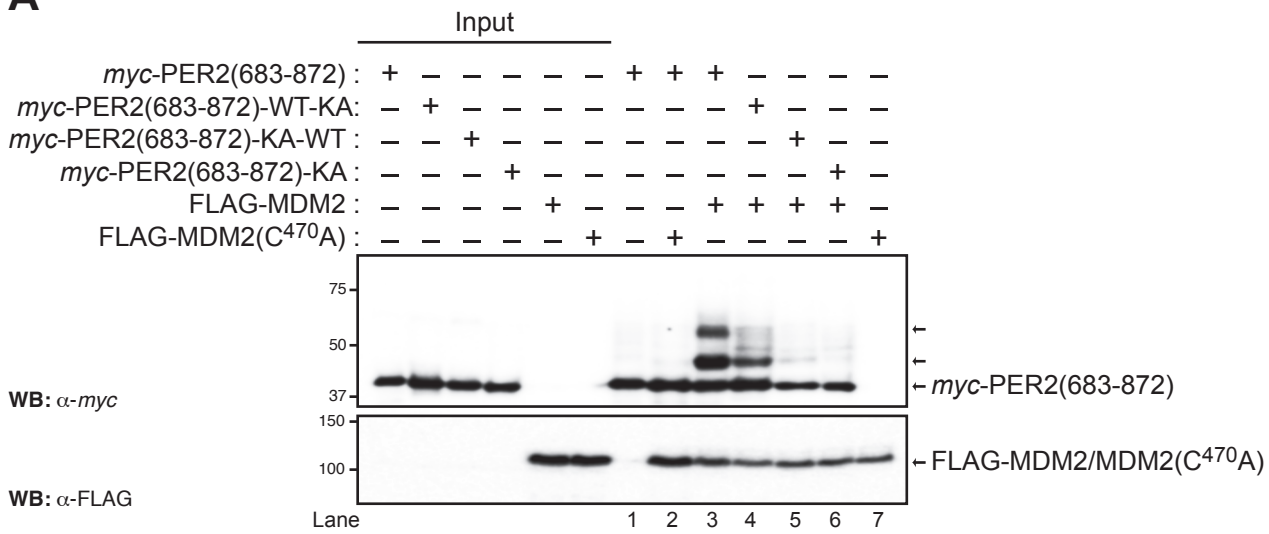

**B**

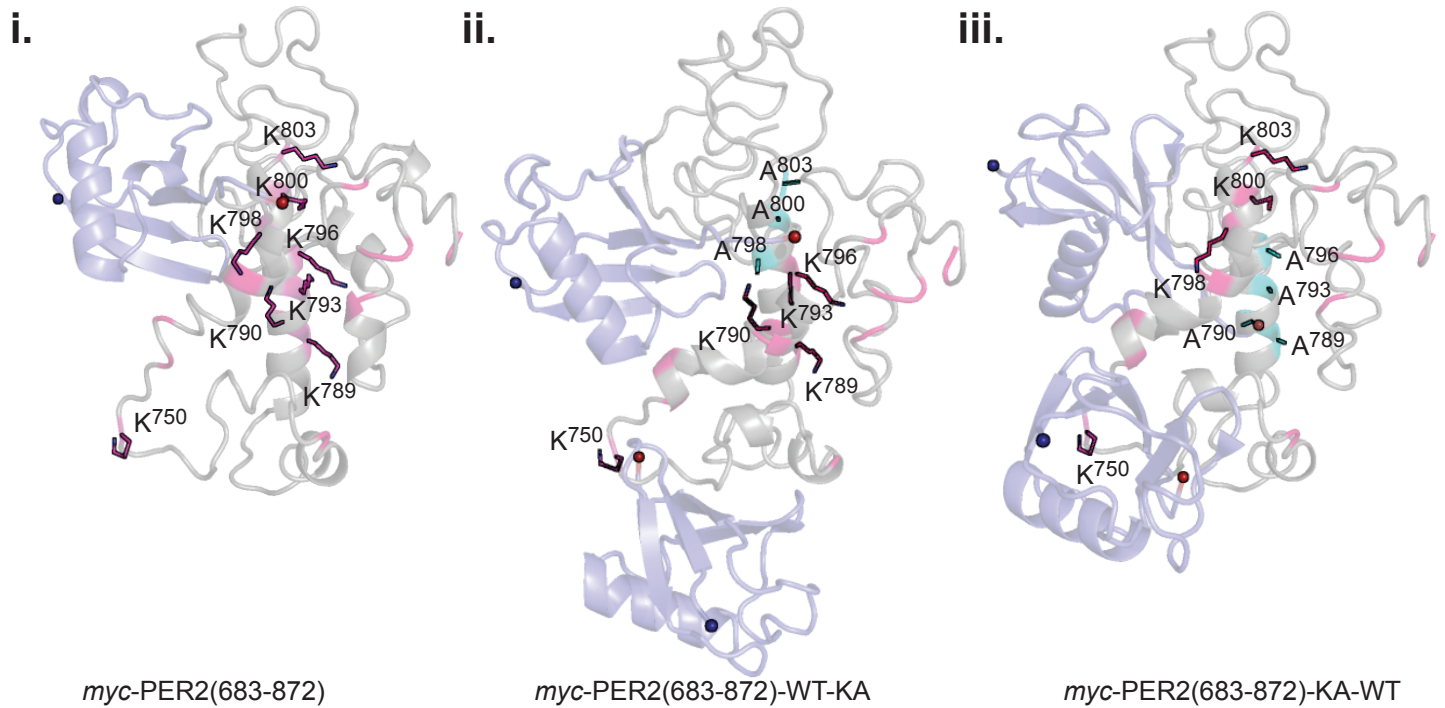

**C**

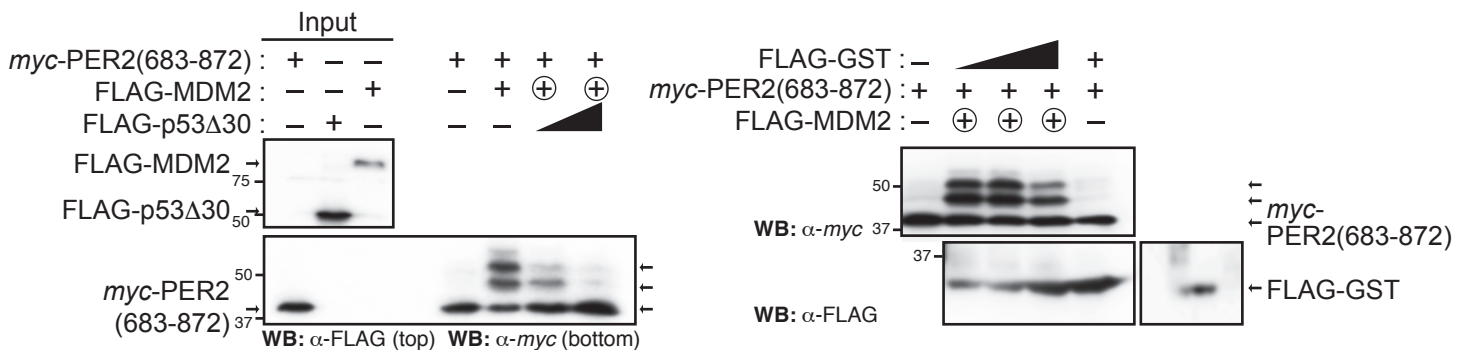



**A**

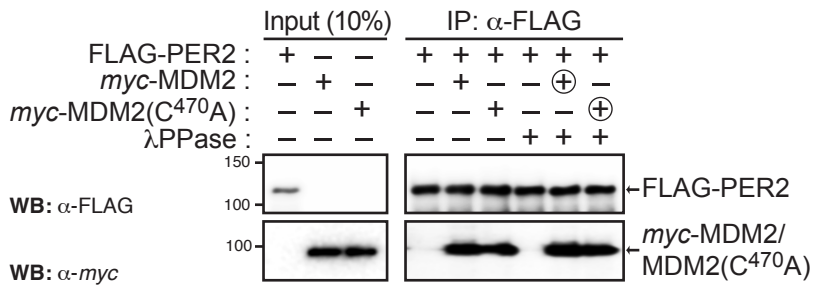

**B**

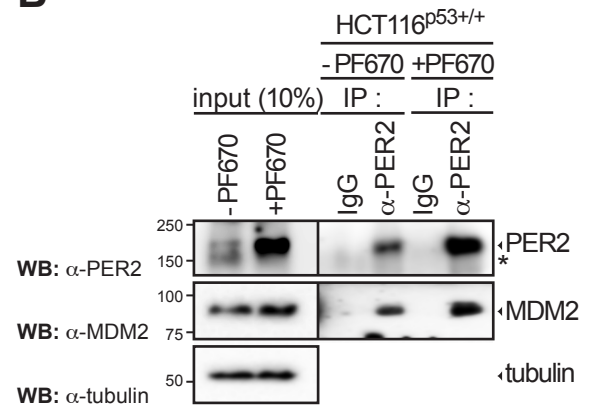

**C**

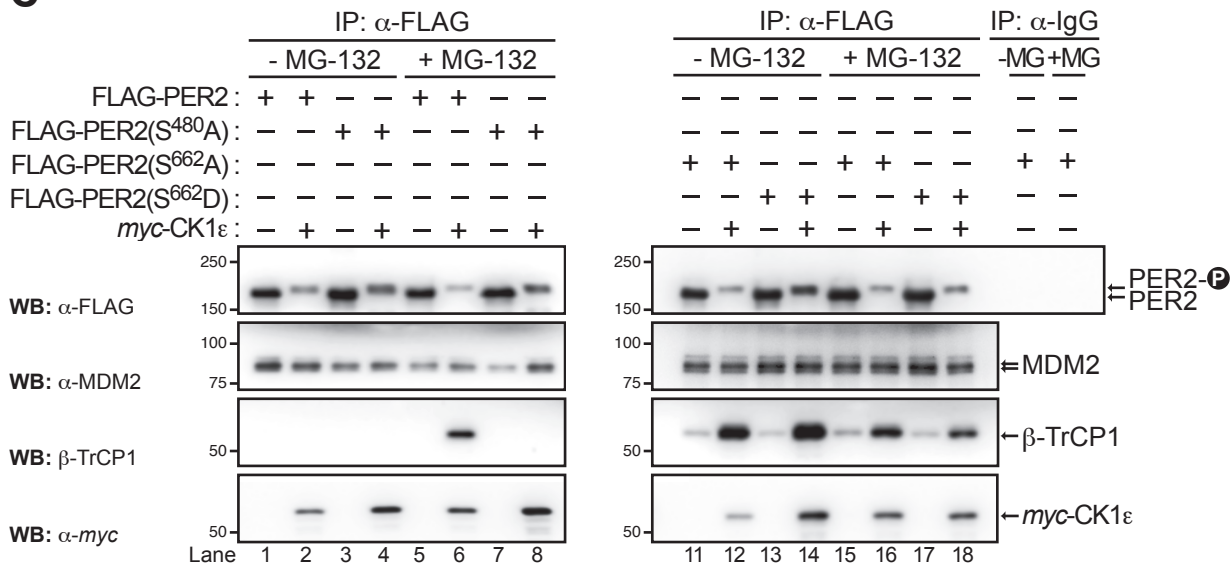

**D**

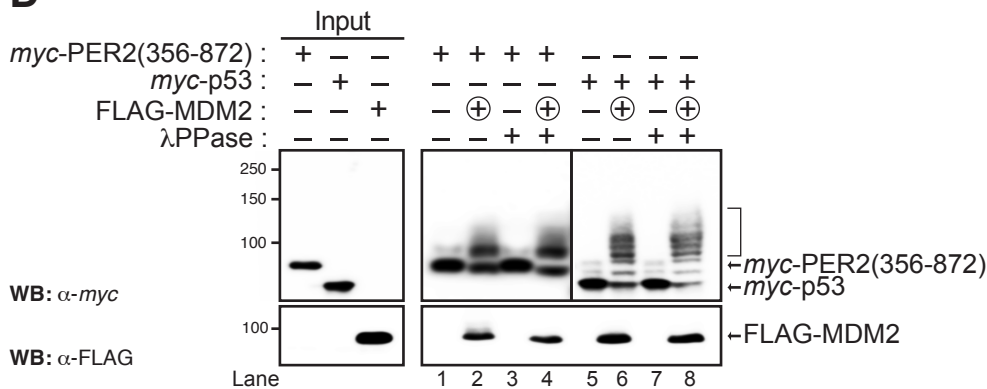

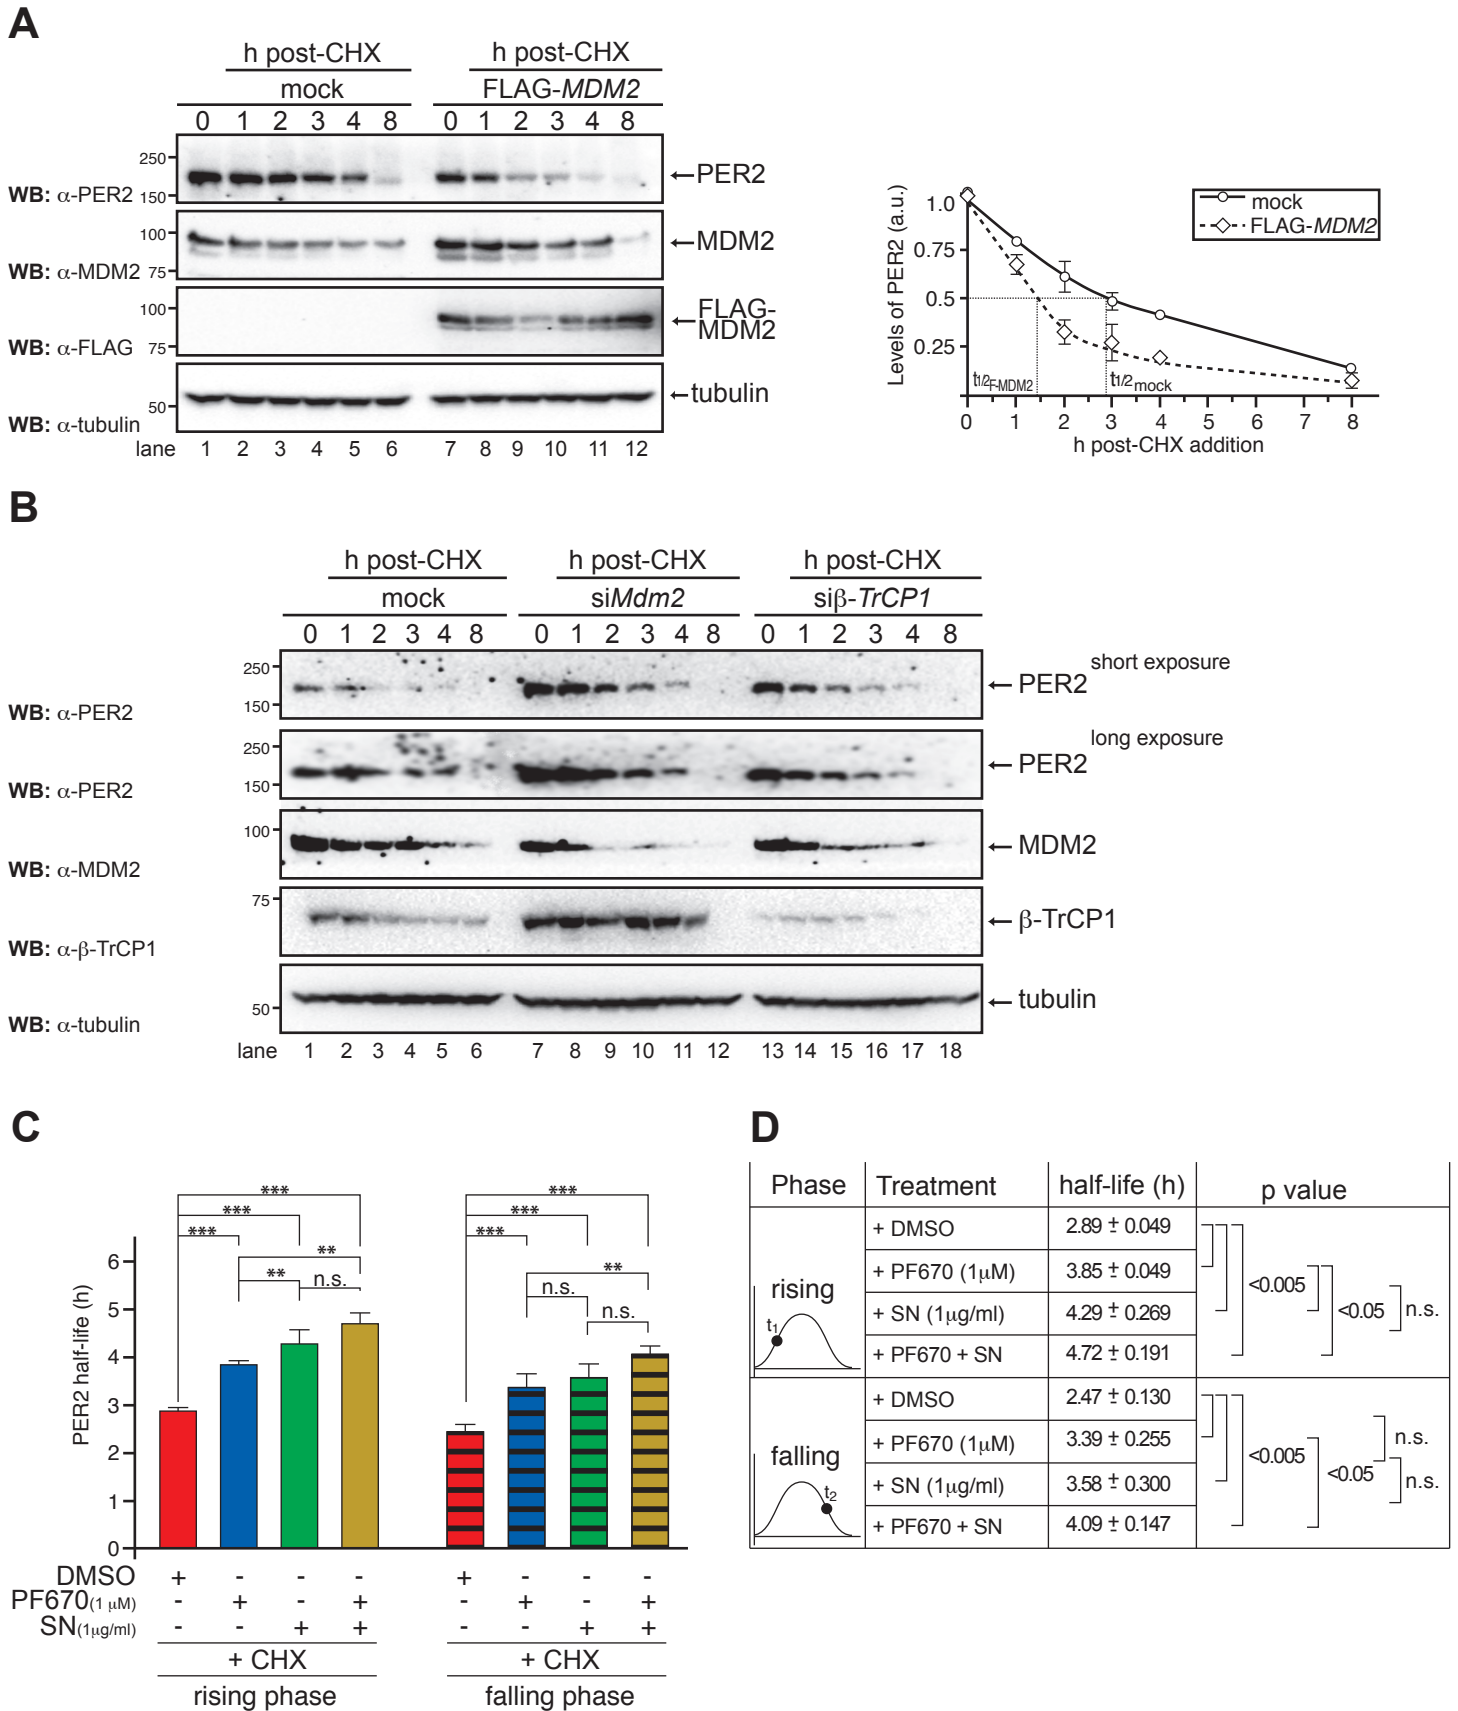

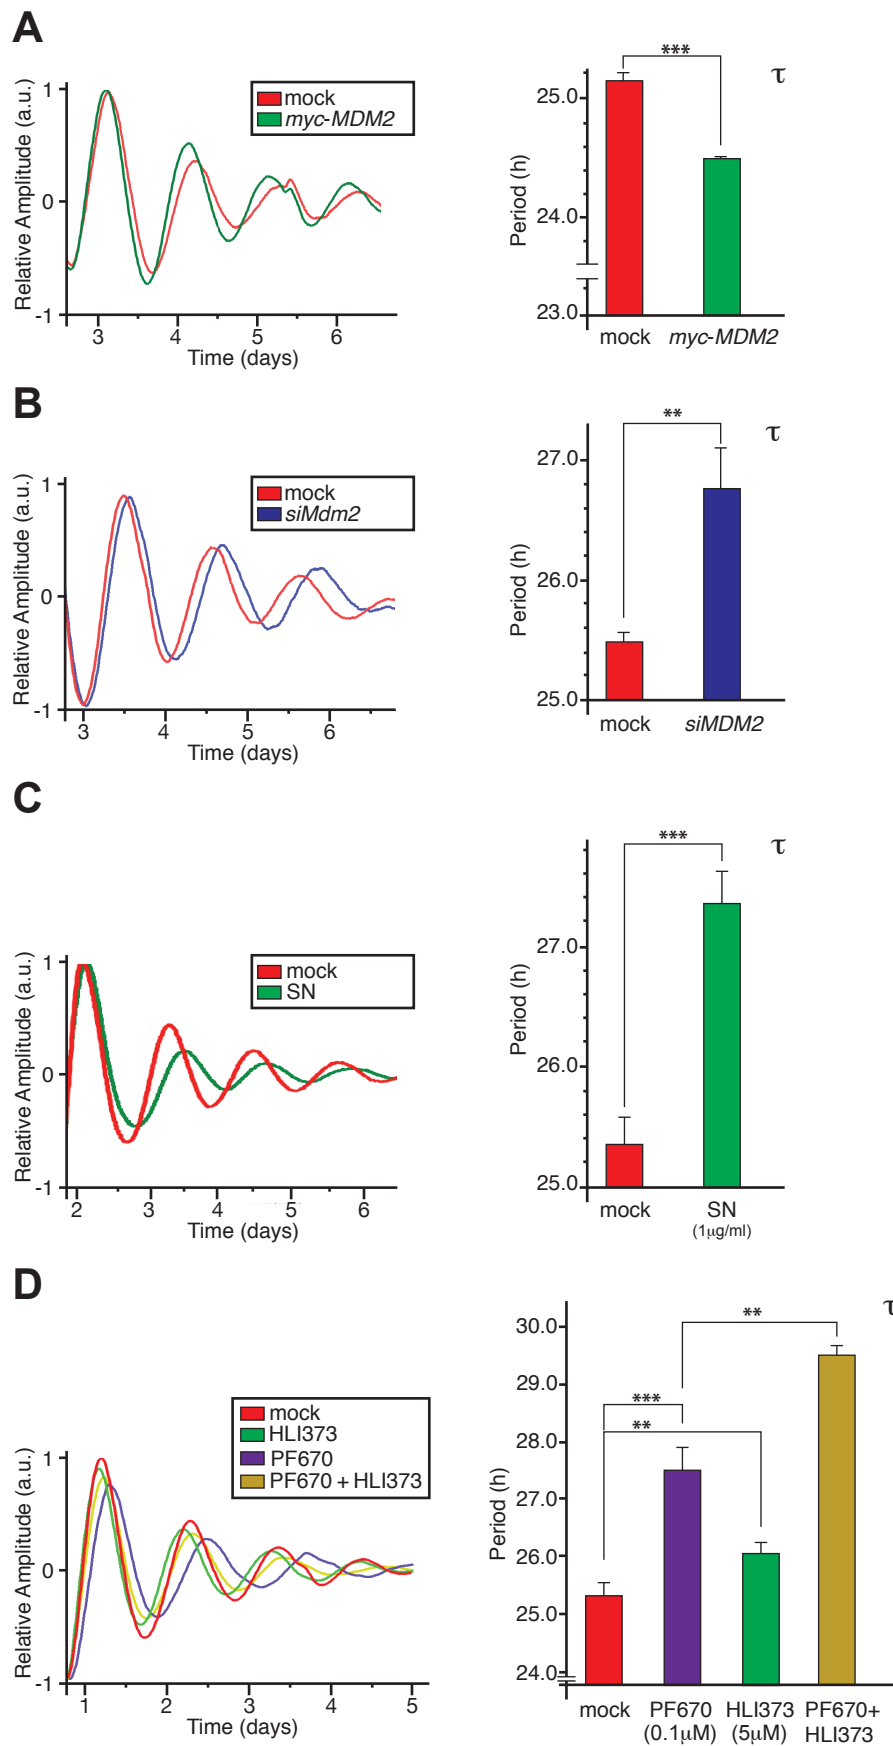

Source: https://biorxiv.org/content/biorxiv/early/2018/03/21/286708.full-text.pdf
